# Supplementary material for: A novel protocol for the one-pot borylation/Suzuki reaction provides easy access to hinge-binding groups for kinase inhibitors
Source: Royal Society of Chemistry journal article supplement (doi:10.1039/c5ob01915j), 2015-11-24

## Supplementary Information

### A novel protocol for the one-pot borylation/Suzuki reaction

A. Hooper,<sup>a</sup> A. Zambon<sup>a+</sup> and C. J. Springer<sup>a+\*</sup>

Cancer Research UK Cancer Therapeutics Unit, Division of Cancer Therapeutics,  
The Institute of Cancer Research, Haddow Laboratories,  
Sutton, Surrey, SM2 5NG, UK.

|                                                                                                 |            |
|-------------------------------------------------------------------------------------------------|------------|
| <b>1. Experimental</b> .....                                                                    | <b>S2</b>  |
| <b>1.1 Kinase Assay</b> .....                                                                   | <b>S2</b>  |
| <b>1.2. General Experiment Details</b> .....                                                    | <b>S2</b>  |
| <b>1.3. General procedure for synthesis of small panel of kinase-like scaffolds 4a-4p</b> ..... | <b>S3</b>  |
| <b>1.4. General procedure for synthesis of small panel of kinase-like scaffolds 5a-5d</b> ..... | <b>S8</b>  |
| <b>2. NMR Spectra</b> .....                                                                     | <b>S11</b> |
| <b>2.1 <sup>1</sup>H NMR</b> .....                                                              | <b>S11</b> |
| <b>2.2 <sup>1</sup>H NMR</b> .....                                                              | <b>S21</b> |

# 1. Experimental

## 1.1. Kinase Assay

IC<sub>50</sub> determinations performed by the SelectScreen® Biochemical Kinase Profiling Service (Invitrogen). To test the enzyme selectively of the inhibitors, ProfilerPro kits (Caliper Life Sciences, Inc.) were used as described in the protocol.

## 1.2. General Experimental Details

Unless otherwise stated, reagents and solvents were purchased from commercial suppliers (Acros, Apollo, Fisher, Fluorochem, Sigma-Aldrich, Strem Chemicals Inc. and VWR) and used without further purification. Chromatography solvents were HPLC grade and were used without further purification. All reactions were carried out in oven-dried flasks under a positive pressure of Argon, and air and moisture sensitive reagents transferred *via* syringe. Compound analysis was performed using MestReNova v7.1.0-9185.

Normal phase thin layer chromatography was conducted on standard commercial aluminium sheets pre-coated with a 0.2 mm layer of silica gel (Merck 60-254), and flash silica column chromatography was performed using a 10 g, 25 g and 50 g pre-packed Biotage Snap columns on a Biotage® Isolera™ Four system.

Microwave-assisted reactions were performed in a Biotage® Initiator 2.5 microwave reactor. <sup>1</sup>H NMR spectra were recorded on a Bruker Avance 500 MHz spectrometer using an internal deuterium lock. Chemical shifts were measured in parts per million (ppm) relative to tetramethylsilane (TMS,  $\delta = 0$ ). Data is presented in the following format: chemical shift (multiplicity, coupling constant (*J* in Hz), integration, assignment).

<sup>13</sup>C NMR spectra were recorded on a Bruker Avance 500 MHz spectrometer using an internal deuterium lock. Chemical shifts were measured in parts per million (ppm) relative to tetramethylsilane (TMS,  $\delta = 0$ ).

LC-MS and HRMS analysis was performed on an Agilent 1200 series HPLC and diode array detector coupled to a 6210 time of flight mass spectrometer with dual multimode APCI/ESI source. Fast4mins: Analytical separation was carried out at 30°C on a Merck Purospher STAR column (RP-18e, 30 x 4 mm) using a flow rate of 1.5 mL/min in a 4-minute gradient elution with detection at 254 nm. The mobile phase was a mixture of methanol (solvent A) and water containing formic acid at 0.1% (solvent B). Gradient elution was as follows: 1:9 (A/B) to 9:1 (A/B) over 2.5 min, 9:1 (A/B) for 1 min, and then reversion back to 1:9 (A/B) over 0.3 min, finally 1:9 (A/B) for 0.2 min. Fast4minsLipo: Analytical separation was carried out at 30°C on a Merck Purospher STAR column (RP-18e, 30 x 4 mm) using a flow rate of 1.5 mL/min in a 4 minute gradient elution with detection at 254 nm. The mobile phase was a mixture of methanol (solvent A) and water containing formic acid at 0.1% (solvent B). Gradient elution was as follows: 1:9 (A/B) to 9:1 (A/B) over 1 min, 9:1 (A/B) for 2.5 min, and then reversion back to 1:9 (A/B) over 0.3 min, finally 1:9 (A/B) for 0.2 min.

The references used for HRMS analysis were: hexakis (2,2-difluoroethoxy)phosphazene  $[M+H]^+$  622.02896 and hexakis(1*H*,1*H*,3*H*-tetrafluoropentoxy)phosphazene  $[M+H]^+$  922.009798. All melting points were determined on a Reichert Thermovar melting point apparatus and are uncorrected.

### 1.3. General procedure for synthesis of small panel of kinase-like scaffolds 4a-4p.

To the appropriate first bromide (1 eq.) and bis(pinacolato)diboron (1.2 eq.) dissolved in 1,4-dioxane (0.5 M) were added KOAc (3 eq.) and tetrakis(triphenylphosphine)palladium(0) (10 mol%) and the reaction mixture was heated under  $\mu$ W irradiation to 120 °C for 45 min. To the crude reaction mixture was added the appropriate second bromide (1 eq.) and a 2M solution  $Na_2CO_3$  (2 eq.) and the reaction mixture was heated under  $\mu$ W irradiation to 120 °C for 30 min. The reaction mixture is then filtered through celite and the organics reduced in vacuo. The residue was then purified by flash silica column chromatography (0-50% EtOAc in cyclohexane) to afford product.

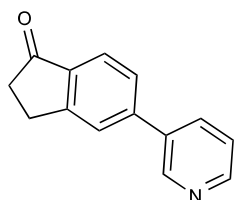

4a

**5-(pyridin-3-yl)-2,3-dihydro-1*H*-inden-1-one, 4a.** 5-bromo-1-indanone (50 mg, 0.24 mmol) and 3-bromopyridine (20  $\mu$ L, 0.24 mmol) were reacted respectively, following general procedure. Product obtained as a cream solid (35 mg, 70%). Mp: 96–100 °C;  $^1H$  NMR (500 MHz, Chloroform- $d_3$ )  $\delta$  8.91 (d,  $J$  = 2.3 Hz, 1H), 8.68 (d,  $J$  = 2.3 Hz, 1H), 7.94 (d,  $J$  = 7.9 Hz, 1H), 7.88 (d,  $J$  = 7.9 Hz, 1H), 7.71 – 7.70 (m, 1H), 7.62 – 7.60 (m, 1H), 7.45 – 7.41 (m, 1H), 3.27 – 3.23 (m, 2H), 2.81 – 2.77 (m, 2H);  $^{13}C$  NMR (126 MHz, Chloroform- $d_3$ )  $\delta$  155.95, 149.44, 148.51, 134.69, 132.06, 128.54, 128.44, 126.73, 125.32, 124.44, 123.68, 123.22, 36.49, 25.90; LC-MS:  $t_R$  = 1.39 min;  $m/z$ : 210 ( $M + H$ ) $^+$  ( $C_{14}H_{12}NO$ ); HRMS: ( $M + H$ ) $^+$  calcd for  $C_{14}H_{12}NO$  210.0919, found 210.0923.

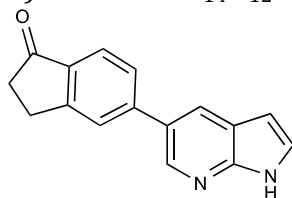

4b

**5-(1*H*-pyrrolo[2,3-*b*]pyridin-5-yl)-2,3-dihydro-1*H*-inden-1-on, 4b.** 5-bromo-1-indanone (50 mg, 0.24 mmol) and 5-bromo-7-azaindole (47 mg, 0.24 mmol) were reacted respectively, following general procedure. Product obtained as a yellow solid (7 mg, 12%). Mp: 264–266 °C;  $^1H$  NMR (500 MHz, DMSO- $d_6$ )  $\delta$  11.80 (s, 1H), 8.60 (d,  $J$  = 2.2 Hz, 1H), 8.32 (d,  $J$  = 2.2 Hz, 1H), 7.94 – 7.92 (m, 1H), 7.78 (d,  $J$  = 8.0 Hz, 1H), 7.71 (d,  $J$  = 8.0 Hz, 1H), 7.64 – 7.62 (m, 1H), 7.56 – 7.53 (m, 1H), 3.20 – 3.16 (m, 2H), 2.70 – 2.66 (m, 2H);  $^{13}C$  NMR (126 MHz, DMSO- $d_6$ )  $\delta$

156.64, 148.90, 145.90, 142.25, 135.60, 132.48, 131.97, 129.14, 127.75, 126.73, 125.44, 123.89, 120.17, 100.85, 36.62, 25.99; LC-MS:  $t_R$  = 2.63 min;  $m/z$ : 249 ( $M + H$ )<sup>+</sup> ( $C_{16}H_{13}N_2O$ ); HRMS: ( $M + H$ )<sup>+</sup> calcd for  $C_{16}H_{13}N_2O$  249.1028, found 249.1021.

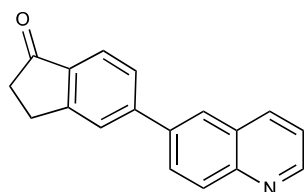

**4c**

**5-(quinolin-6-yl)-2,3-dihydro-1H-inden-1-one, 4c.** 5-bromo-1-indanone (50 mg, 0.24 mmol) and 6-bromoquinoline (32  $\mu$ L, 0.24 mmol) were reacted respectively, following general procedure. Product obtained as a white solid (42 mg, 67%). Mp: 147–151 °C; <sup>1</sup>H NMR (500 MHz, Chloroform- $d_3$ )  $\delta$  8.98 (d,  $J$  = 4.3 Hz, 1H), 8.27 – 8.25 (m, 1H), 8.23 (d,  $J$  = 8.7 Hz, 1H), 8.09 (d,  $J$  = 2.1 Hz, 1H), 8.02 (d,  $J$  = 8.7 Hz, 1H), 7.90 (d,  $J$  = 8.0 Hz, 1H), 7.84 – 7.82 (m, 1H), 7.76 (d,  $J$  = 8.0 Hz, 1H), 7.71 – 7.66 (m, 1H), 3.28 – 3.25 (m, 2H), 2.82 – 2.78 (m, 2H); <sup>13</sup>C NMR (126 MHz, Chloroform- $d_3$ )  $\delta$  188.18, 150.95, 148.03, 146.75, 138.34, 136.38, 132.06, 130.26, 129.04, 128.54, 128.39, 127.08, 126.39, 125.58, 124.29, 121.77, 36.56, 25.93; LC-MS:  $t_R$  = 2.55 min;  $m/z$ : 260 ( $M + H$ )<sup>+</sup> ( $C_{18}H_{14}NO$ ); HRMS: ( $M + H$ )<sup>+</sup> calcd for  $C_{18}H_{14}NO$  260.1075, found 260.1067.

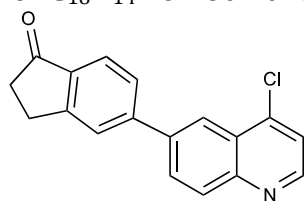

**4d**

**5-(4-chloroquinolin-6-yl)-2,3-dihydro-1H-inden-1-one, 4d.** 5-bromo-1-indanone (50 mg, 0.24 mmol) and 6-bromo-4-chloroquinoline (58 mg, 0.24 mmol) were reacted respectively, following general procedure. Product obtained as a white solid (70 mg, 100%). Mp: 128–131 °C; <sup>1</sup>H NMR (500 MHz, Chloroform- $d_3$ )  $\delta$  8.84 (d,  $J$  = 4.7 Hz, 1H), 8.49 – 8.48 (m, 1H), 8.25 (d,  $J$  = 8.7 Hz, 1H), 8.08 (d,  $J$  = 8.7 Hz, 1H), 7.92 (d,  $J$  = 7.9 Hz, 1H), 7.87 – 7.85 (m, 1H), 7.78 (d,  $J$  = 7.9 Hz, 1H), 7.58 (d,  $J$  = 4.7 Hz, 1H), 3.30 – 3.27 (m, 2H), 2.82 – 2.79 (m, 2H); <sup>13</sup>C NMR (126 MHz, Chloroform- $d_3$ )  $\delta$  184.38, 150.30, 143.48, 132.14, 131.92, 130.67, 129.99, 128.85, 128.40, 127.21, 125.76, 124.38, 124.03, 122.73, 121.88, 121.38, 36.57, 24.87; LC-MS:  $t_R$  = 3.15 min;  $m/z$ : 294 ( $M + H$ )<sup>+</sup> ( $C_{18}H_{13}ClNO$ ); HRMS: ( $M + H$ )<sup>+</sup> calcd for  $C_{18}H_{13}ClNO$  294.0686, found 294.0694.

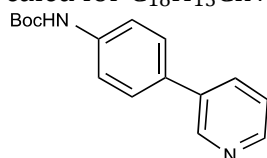

**4e**

**tert-butyl (4-(pyridin-3-yl)phenyl)carbamate, 4e.** *Tert*-butyl (4-bromophenyl)carbamate (50 mg, 0.18 mmol) and 3-bromopyridine (18  $\mu$ L, 0.18 mmol) were reacted respectively, following general procedure. Product obtained as a cream solid (26 mg, 52%). Mp: 147–149 °C; <sup>1</sup>H NMR (500 MHz, Chloroform- $d_3$ )  $\delta$  8.84 – 8.83 (m, 1H), 8.58 – 8.56 (m, 1H), 7.86 (d,  $J$  = 7.9 Hz, 1H), 7.54 (d,  $J$  =

8.6 Hz, 2H), 7.50 (d,  $J = 8.6$  Hz, 2H), 7.35 (d,  $J = 7.9$  Hz, 1H), 6.65 (s, 1H), 1.55 (s, 9H);  $^{13}\text{C}$  NMR (126 MHz, Chloroform- $d_3$ )  $\delta$  152.63, 148.10, 148.00, 138.53, 136.09, 133.92, 132.36, 127.67, 123.52, 118.96, 80.82, 28.34; LC-MS:  $t_R = 2.38$  min;  $m/z$ : 271 ( $M + H$ ) $^+$  ( $\text{C}_{16}\text{H}_{19}\text{N}_2\text{O}_2$ ); HRMS: ( $M + H$ ) $^+$  calcd for  $\text{C}_{16}\text{H}_{19}\text{N}_2\text{O}_2$  271.1447, found 271.1441.

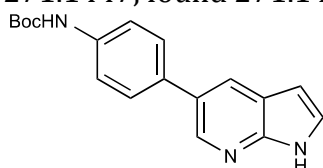

**4f**

**tert-butyl (4-(1H-pyrrolo[2,3-b]pyridin-5-yl)phenyl)carbamate, 4f.** *Tert*-butyl (4-bromophenyl)carbamate (500 mg, 1.57 mmol) and 5-bromo-7-azaindole (309 mg, 1.57 mmol) were reacted respectively, following general procedure. Product obtained as an orange solid (301 mg, 53%). Mp: 187–190 °C;  $^1\text{H}$  NMR (500 MHz, Chloroform- $d_3$ )  $\delta$  9.29 (s, 1H), 8.54 (d,  $J = 2.1$  Hz, 1H), 8.10 (d,  $J = 2.1$  Hz, 1H), 7.57 (d,  $J = 8.6$  Hz, 2H), 7.49 (d,  $J = 8.6$  Hz, 2H), 7.38 – 7.36 (m, 1H), 6.59 (s, 1H), 6.58 – 6.55 (m, 1H), 1.56 (s, 9H);  $^{13}\text{C}$  NMR (126 MHz, Chloroform- $d_3$ )  $\delta$  151.82, 142.21, 140.76, 137.49, 134.33, 129.43, 127.88, 127.00, 125.52, 120.18, 119.04, 101.23, 28.37, 24.87; LC-MS:  $t_R = 2.85$  min;  $m/z$ : 310 ( $M + H$ ) $^+$  ( $\text{C}_{18}\text{H}_{20}\text{N}_3\text{O}_2$ ); HRMS: ( $M + H$ ) $^+$  calcd for  $\text{C}_{18}\text{H}_{20}\text{N}_3\text{O}_2$  310.1556, found 310.1554.

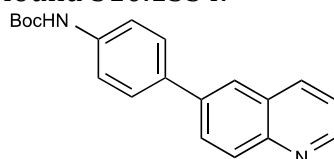

**4g**

**tert-butyl (4-(quinolin-6-yl)phenyl)carbamate, 4g.** *Tert*-butyl (4-bromophenyl)carbamate (50 mg, 0.18 mmol) and 6-bromoquinoline (25  $\mu\text{L}$ , 0.18 mmol) were reacted respectively, following general procedure. Product obtained as a cream solid (27 mg, 46%). Mp: 158–160 °C;  $^1\text{H}$  NMR (500 MHz, Chloroform- $d_3$ )  $\delta$  8.92 (d,  $J = 4.2$  Hz, 1H), 8.22 (d,  $J = 8.4$  Hz, 1H), 8.19 – 8.15 (m, 1H), 7.99 (d,  $J = 2.1$  Hz, 1H), 7.98 – 7.97 (m, 1H), 7.68 (d,  $J = 8.5$  Hz, 2H), 7.52 (d,  $J = 8.5$  Hz, 2H), 7.44 (d,  $J = 8.4$  Hz, 1H), 6.60 (s, 1H), 1.56 (s, 9H);  $^{13}\text{C}$  NMR (126 MHz, Chloroform- $d_3$ )  $\delta$  150.20, 147.54, 138.72, 136.15, 132.33, 129.86, 128.98, 128.52, 127.96, 126.77, 124.81, 121.46, 118.87, 109.53, 104.08, 28.36; LC-MS:  $t_R = 2.89$  min;  $m/z$ : 321 ( $M + H$ ) $^+$  ( $\text{C}_{20}\text{H}_{21}\text{N}_2\text{O}_2$ ); HRMS: ( $M + H$ ) $^+$  calcd for  $\text{C}_{20}\text{H}_{21}\text{N}_2\text{O}_2$  321.1603, found 321.1602.

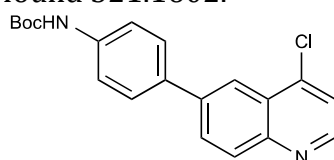

**4h**

**tert-butyl (4-(4-chloroquinolin-6-yl)phenyl)carbamate, 4h.** *Tert*-butyl (4-bromophenyl)carbamate (50 mg, 0.18 mmol) and 6-bromo-4-chloroquinoline (44 mg, 0.18 mmol) were reacted respectively, following general procedure. Product obtained as a cream solid (26 mg, 40%). Mp: 124–126 °C;  $^1\text{H}$  NMR (500 MHz, Chloroform- $d_3$ )  $\delta$  8.78 (d,  $J = 4.6$  Hz, 1H), 8.39 – 8.38 (m, 1H), 8.19 (d,  $J =$

8.8 Hz, 1H), 8.03 (d,  $J = 8.8$  Hz, 1H), 7.71 (d,  $J = 8.7$  Hz, 2H), 7.55 (d,  $J = 4.6$  Hz, 1H), 7.53 (d,  $J = 8.7$  Hz, 2H), 6.61 (s, 1H), 1.57 (s, 9H);  $^{13}\text{C}$  NMR (126 MHz, Chloroform- $d_3$ )  $\delta$  162.75, 149.52, 148.59, 139.67, 137.83, 137.79, 132.39, 130.29, 129.89, 128.13, 124.56, 121.59, 121.10, 118.90, 99.99, 28.36; LC-MS:  $t_R = 3.35$  min;  $m/z$ : 355 ( $M + H$ ) $^+$  ( $\text{C}_{20}\text{H}_{20}\text{ClN}_2\text{O}_2$ ); HRMS: ( $M + H$ ) $^+$  calcd for  $\text{C}_{20}\text{H}_{20}\text{ClN}_2\text{O}_2$  355.1213, found 355.1212.

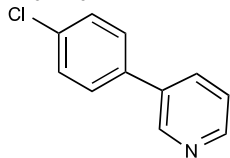

4i

**3-(4-chlorophenyl)pyridine, 4i.** 1-bromo-4-chlorobenzene (50 mg, 0.26 mmol) and 3-bromopyridine (25  $\mu\text{L}$ , 0.26 mmol) were reacted respectively, following general procedure. Product obtained as a colourless oil (21 mg, 42%).  $^1\text{H}$  NMR (500 MHz, Chloroform- $d_3$ )  $\delta$  8.84 – 8.82 (m, 1H), 8.63 – 8.61 (m, 1H), 7.85 (d,  $J = 7.9$  Hz, 1H), 7.52 (d,  $J = 8.7$  Hz, 2H), 7.46 (d,  $J = 8.7$  Hz, 2H), 7.38 (d,  $J = 7.9$  Hz, 1H);  $^{13}\text{C}$  NMR (126 MHz, Chloroform- $d_3$ )  $\delta$  148.81, 148.14, 136.28, 135.49, 134.38, 134.18, 129.29, 128.39, 123.61; LC-MS:  $t_R = 2.44$  min;  $m/z$ : 190 ( $M + H$ ) $^+$  ( $\text{C}_{11}\text{H}_9\text{ClN}$ ); HRMS: ( $M + H$ ) $^+$  calcd for  $\text{C}_{11}\text{H}_9\text{ClN}$  190.0424, found 190.0418.

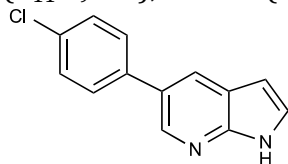

4j

**5-(4-chlorophenyl)-1H-pyrrolo[2,3-b]pyridine, 4j.** 1-bromo-4-chlorobenzene (50 mg, 0.26 mmol) and 5-bromo-7-azaindole (52 mg, 0.26 mmol) were reacted respectively, following general procedure. Product obtained as a cream solid (19 mg, 32%). Mp: 210–212  $^\circ\text{C}$ ;  $^1\text{H}$  NMR (500 MHz, Chloroform- $d_3$ )  $\delta$  9.70 (s, 1H), 8.55 (d,  $J = 2.1$  Hz, 1H), 8.12 (d,  $J = 2.1$  Hz, 1H), 7.58 (d,  $J = 8.6$  Hz, 2H), 7.46 (d,  $J = 8.6$  Hz, 2H), 7.42 – 7.40 (m, 1H), 6.60 – 6.58 (m, 1H);  $^{13}\text{C}$  NMR (126 MHz, Chloroform- $d_3$ )  $\delta$  142.16, 138.09, 133.18, 129.07, 128.63, 127.24, 125.82, 120.21, 101.33, 99.99, 29.72; LC-MS:  $t_R = 3.06$  min;  $m/z$ : 229 ( $M + H$ ) $^+$  ( $\text{C}_{13}\text{H}_{10}\text{ClN}_2$ ); HRMS: ( $M + H$ ) $^+$  calcd for  $\text{C}_{13}\text{H}_{10}\text{ClN}_2$  229.0533, found 229.0524.

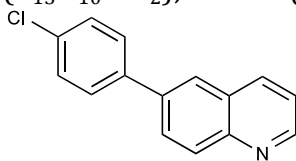

4k

**6-(4-chlorophenyl)quinoline, 4k.** 1-bromo-4-chlorobenzene (50 mg, 0.26 mmol) and 6-bromoquinoline (36  $\mu\text{L}$ , 0.26 mmol) were reacted respectively, following general procedure. Product obtained as a yellow waxy solid (39 mg, 62%). Mp: 56–60  $^\circ\text{C}$ ;  $^1\text{H}$  NMR (500 MHz, Chloroform- $d_3$ )  $\delta$  8.94 (d,  $J = 4.2$  Hz, 1H), 8.23 – 8.21 (m, 1H), 8.20 (d,  $J = 8.8$  Hz, 1H), 7.98 (d,  $J = 2.1$  Hz, 1H), 7.95 (d,  $J = 8.8$  Hz, 1H), 7.66 (d,  $J = 8.6$  Hz, 2H), 7.48 (d,  $J = 8.6$  Hz, 2H), 7.47 – 7.44 (m, 1H);  $^{13}\text{C}$  NMR (126 MHz, Chloroform- $d_3$ )  $\delta$  150.60, 147.73, 138.76, 138.07, 136.23, 133.95, 130.11, 129.14, 128.87, 128.69, 128.43, 125.46, 121.63; LC-MS:  $t_R = 3.08$

min;  $m/z$ : 240 ( $M + H$ )<sup>+</sup> ( $C_{15}H_{11}ClN$ ); HRMS: ( $M + H$ )<sup>+</sup> calcd for  $C_{15}H_{11}ClN$  240.0580, found 240.0575.

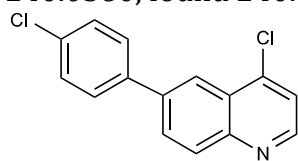

**4l**

**4-chloro-6-(4-chlorophenyl)quinoline, 4l.** 1-bromo-4-chlorobenzene (50 mg, 0.26 mmol) and 6-bromo-4-chloroquinoline (63 mg, 0.26 mmol) were reacted respectively, following general procedure. Product obtained as a white solid (35 mg, 49%). Mp: 101–104 °C; <sup>1</sup>H NMR (500 MHz, Chloroform-d<sub>3</sub>) δ 8.81 (d,  $J = 4.7$  Hz, 1H), 8.40 – 8.39 (m, 1H), 8.21 (d,  $J = 8.7$  Hz, 1H), 8.01 (d,  $J = 8.7$  Hz, 1H), 7.70 (d,  $J = 8.6$  Hz, 2H), 7.55 (d,  $J = 4.7$  Hz, 1H), 7.51 (d,  $J = 8.6$  Hz, 2H); <sup>13</sup>C NMR (126 MHz, Chloroform-d<sub>3</sub>) δ 149.95, 148.56, 142.74, 139.23, 138.47, 135.88, 134.34, 130.56, 129.79, 129.24, 128.83, 126.70, 121.80; LC-MS:  $t_R = 3.54$  min;  $m/z$ : 274 ( $M + H$ )<sup>+</sup> ( $C_{15}H_{10}Cl_2N$ ); HRMS: ( $M + H$ )<sup>+</sup> calcd for  $C_{15}H_{10}Cl_2N$  274.0190, found 274.0185.

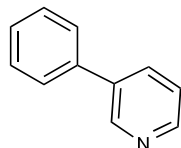

**4m**

**3-phenylpyridine, 4m.** Bromobenzene (32 μL, 0.32 mmol) and 3-bromopyridine (31 μL, 0.32 mmol) were reacted respectively, following general procedure. Product obtained as a yellow oil (40 mg, 81%). <sup>1</sup>H NMR (500 MHz, Chloroform-d<sub>3</sub>) δ 8.88 – 8.86 (m, 1H), 8.61 – 8.59 (m, 1H), 7.89 (d,  $J = 7.9$  Hz, 1H), 7.60 (d,  $J = 7.4$  Hz, 2H), 7.50 (t,  $J = 7.6$  Hz, 2H), 7.44 – 7.40 (m, 1H), 7.38 (d,  $J = 7.9$  Hz, 1H); <sup>13</sup>C NMR (126 MHz, Chloroform-d<sub>3</sub>) δ 148.48, 137.84, 136.65, 134.36, 132.14, 129.08, 128.11, 127.16, 123.55; LC-MS:  $t_R = 1.25$  min;  $m/z$ : 156 ( $M + H$ )<sup>+</sup> ( $C_{11}H_{10}N$ ); HRMS: ( $M + H$ )<sup>+</sup> calcd for  $C_{11}H_{10}N$  156.0813, found 156.0816.

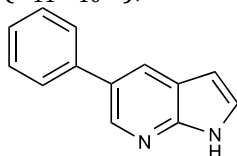

**4n**

**5-phenyl-1H-pyrrolo[2,3-b]pyridine, 4n.** Bromobenzene (32 μL, 0.32 mmol) and 5-bromo-7-azaindole (63 mg, 0.32 mmol) were reacted respectively, following general procedure. Product obtained as a white solid (28 mg, 45%). Mp: 156–160 °C; <sup>1</sup>H NMR (500 MHz, Chloroform-d<sub>3</sub>) δ 10.07 (s, 1H), 8.60 (d,  $J = 2.1$  Hz, 1H), 8.17 (d,  $J = 2.1$  Hz, 1H), 7.67 (d,  $J = 7.1$  Hz, 2H), 7.50 (t,  $J = 7.7$  Hz, 2H), 7.43 – 7.40 (m, 1H), 7.40 – 7.37 (m, 1H), 6.60 – 6.59 (m, 1H); <sup>13</sup>C NMR (126 MHz, Chloroform-d<sub>3</sub>) δ 148.13, 142.39, 139.63, 132.28, 129.89, 128.92, 127.44, 127.01, 125.65, 120.24, 101.24; LC-MS:  $t_R = 2.78$  min;  $m/z$ : 195 ( $M + H$ )<sup>+</sup> ( $C_{13}H_{11}N_2$ ); HRMS: ( $M + H$ )<sup>+</sup> calcd for  $C_{13}H_{11}N_2$  195.0922, found 195.0917.

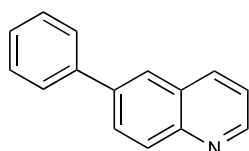

**4o**

**6-phenylquinoline, 4o.** Bromobenzene (32  $\mu$ L, 0.32 mmol) and 6-bromoquinoline (43  $\mu$ L, 0.32 mmol) were reacted respectively, following general procedure. Product obtained as a yellow solid (58 mg, 87%). Mp: 51–55  $^{\circ}$ C;  $^1$ H NMR (500 MHz, Chloroform- $d_3$ )  $\delta$  8.94 (d,  $J$  = 4.2 Hz, 1H), 8.23 (d,  $J$  = 8.4 Hz, 1H), 8.20 (d,  $J$  = 8.4 Hz, 1H), 8.03 – 8.01 (m, 1H), 8.00 (d,  $J$  = 2.1 Hz, 1H), 7.74 (d,  $J$  = 8.4 Hz, 2H), 7.52 (t,  $J$  = 7.6 Hz, 2H), 7.47 – 7.45 (m, 1H), 7.44 – 7.41 (m, 1H);  $^{13}$ C NMR (126 MHz, Chloroform- $d_3$ )  $\delta$  150.38, 147.68, 140.33, 139.34, 136.25, 129.90, 129.24, 128.97, 128.47, 127.76, 127.47, 125.48, 121.48; LC-MS:  $t_R$  = 2.80 min;  $m/z$ : 206 ( $M + H$ ) $^+$  ( $C_{15}H_{12}N$ ); HRMS: ( $M + H$ ) $^+$  calcd for  $C_{15}H_{12}N$  206.0970, found 206.0967.

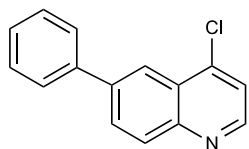

**4p**

**4-chloro-6-phenylquinoline, 4p.** Bromobenzene (32  $\mu$ L, 0.32 mmol) and 6-bromo-4-chloroquinoline (78 mg, 0.32 mmol) were reacted respectively, following general procedure. Product obtained as a white solid (52 mg, 68%). Mp: 79–81  $^{\circ}$ C;  $^1$ H NMR (500 MHz, Chloroform- $d_3$ )  $\delta$  8.94 (d,  $J$  = 4.2 Hz, 1H), 8.23 (d,  $J$  = 8.4 Hz, 1H), 8.20 (d,  $J$  = 8.4 Hz, 1H), 8.03 – 8.01 (m, 1H), 7.74 (d,  $J$  = 8.4 Hz, 2H), 7.54 (d,  $J$  = 4.2 Hz, 1H), 7.52 (t,  $J$  = 7.6 Hz, 2H), 7.47 – 7.45 (m, 1H);  $^{13}$ C NMR (126 MHz, Chloroform- $d_3$ )  $\delta$  149.72, 148.50, 142.76, 140.49, 140.03, 130.33, 130.15, 129.05, 128.08, 127.61, 126.70, 121.83, 121.61; LC-MS:  $t_R$  = 3.36 min;  $m/z$ : 240 ( $M + H$ ) $^+$  ( $C_{15}H_{11}ClN$ ); HRMS: ( $M + H$ ) $^+$  calcd for  $C_{15}H_{11}ClN$  240.0580, found 240.0575.

#### 1.4. General procedure for synthesis of small panel of kinase-like scaffolds 5a-5d.

To the appropriate first bromide (1 eq.) and bis(pinacolato)diboron (1.2 eq.) dissolved in 1,4-dioxane (0.4 M) were added KOAc (3 eq.) and tetrakis(triphenylphosphine)palladium(0) (10 mol%) and the reaction mixture was heated under  $\mu$ W irradiation to 120  $^{\circ}$ C for 90 min. To the crude reaction mixture was added the appropriate second bromide (1 eq.) and a 2M solution  $Na_2CO_3$  (2 eq.) and the reaction mixture was heated under  $\mu$ W irradiation to 120  $^{\circ}$ C for 60 min. The reaction mixture is then filtered through celite and the organics reduced in vacuo. The residue was then purified by flash silica column chromatography (0-50% EtOAc in cyclohexane) to afford product.



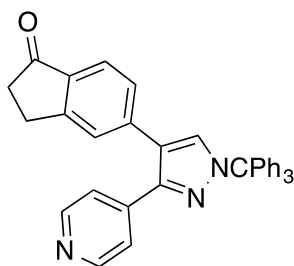

5a

**5-(3-(pyridin-4-yl)-1-trityl-1H-pyrazol-4-yl)-2,3-dihydro-1H-inden-1-one, 5a.** 4-(4-bromo-1-trityl-1H-pyrazol-3-yl)pyridine (2.00 g, 4.30 mmol) and 5-bromo-1-indanone (0.90 g, 4.30 mmol) were reacted respectively, following general procedure. Product obtained as a white solid (1.27 g, 57%). Mp: 48-51 °C; <sup>1</sup>H NMR (500 MHz, MeOD-d<sub>4</sub>) δ 8.52 (d, J = 6.1 Hz, 2H), 7.71 (d, J = 7.9 Hz, 1H), 7.49 (s, 1H), 7.41 (d, J = 6.1 Hz, 2H), 7.37 (d, J = 7.9 Hz, 1H), 7.38 – 7.36 (m, 10H), 7.26 – 7.25 (m, 1H), 7.25 – 7.24 (m, 5H), 3.12 – 3.08 (m, 2H), 2.74 – 2.70 (m, 2H); <sup>13</sup>C NMR (126 MHz, MeOD-d<sub>4</sub>) δ 206.31, 155.62, 149.81, 145.99, 142.73, 140.95, 139.44, 138.47, 135.81, 133.55, 130.28, 128.23, 128.04, 127.85, 126.57, 123.94, 122.61, 119.66, 36.38, 24.87; LC-MS: *t<sub>R</sub>* = 3.72 min; *m/z*: 518 (M + H)<sup>+</sup> (C<sub>36</sub>H<sub>28</sub>N<sub>3</sub>O); HRMS: (M + H)<sup>+</sup> calcd for C<sub>36</sub>H<sub>28</sub>N<sub>3</sub>O 518.2232, found 518.2220.

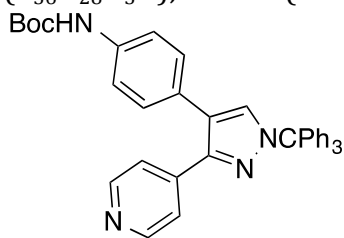

5b

**tert-butyl (4-(3-(pyridin-4-yl)-1-trityl-1H-pyrazol-4-yl)phenyl)carbamate, 5b.** 4-(4-bromo-1-trityl-1H-pyrazol-3-yl)pyridine (100 mg, 0.22 mmol) and *tert*-butyl (4-bromophenyl)carbamate (58 mg, 0.22 mmol) were reacted respectively, following general procedure. Product obtained as a white solid (41 mg, 33%). Mp: 204–206 °C; <sup>1</sup>H NMR (500 MHz, Chloroform-d<sub>3</sub>) δ 8.48 (d, J = 6.2 Hz, 2H), 7.44 (d, J = 6.2 Hz, 2H), 7.37 – 7.35 (m, 12H), 7.33 (s, 1H), 7.27 – 7.25 (m, 3H), 7.24 (d, J = 8.5 Hz, 2H), 7.19 (d, J = 8.5 Hz, 2H), 6.53 (s, 1H), 1.54 (s, 9H); <sup>13</sup>C NMR (126 MHz, Chloroform-d<sub>3</sub>) δ 149.70, 147.37, 145.50, 142.98, 141.31, 138.61, 137.48, 134.53, 133.18, 130.32, 129.58, 127.88, 127.75, 127.38, 122.30, 120.05, 118.53, 28.35; LC-MS: *t<sub>R</sub>* = 3.40 min; *m/z*: 579 (M + H)<sup>+</sup> (C<sub>38</sub>H<sub>35</sub>N<sub>4</sub>O<sub>2</sub>); HRMS: (M + H)<sup>+</sup> calcd for C<sub>38</sub>H<sub>35</sub>N<sub>4</sub>O<sub>2</sub> 579.2760, found 579.2932.

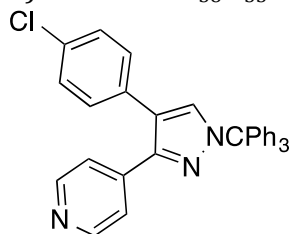

5c

**4-(4-(4-chlorophenyl)-1-trityl-1H-pyrazol-3-yl)pyridine, 5c.** 4-(4-bromo-1-trityl-1H-pyrazol-3-yl)pyridine (100 mg, 0.22 mmol) and 1-bromo-4-chlorobenzene (41 mg, 0.22 mmol) were reacted respectively, following general

procedure. Product obtained as a white solid (52 mg, 49%). Mp: 186–190 °C;  $^1\text{H}$  NMR (500 MHz, Chloroform- $d_3$ )  $\delta$  8.51 (d,  $J$  = 6.1 Hz, 2H), 7.40 (d,  $J$  = 6.1 Hz, 2H), 7.39 (s, 1H), 7.37 – 7.35 (m, 10H), 7.30 (d,  $J$  = 8.6 Hz, 2H), 7.25 – 7.23 (m, 5H), 7.20 (d,  $J$  = 8.6 Hz, 2H);  $^{13}\text{C}$  NMR (126 MHz, Chloroform- $d_3$ )  $\delta$  149.81, 145.63, 142.85, 141.46, 141.01, 139.90, 138.06, 133.22, 130.29, 130.20, 128.78, 127.96, 127.80, 122.38, 94.63; LC-MS:  $t_{\text{R}}$  = 3.67 min;  $m/z$ : 498 ( $\text{M} + \text{H}$ ) $^+$  ( $\text{C}_{33}\text{H}_{25}\text{ClN}_3$ ); HRMS: ( $\text{M} + \text{H}$ ) $^+$  calcd for  $\text{C}_{33}\text{H}_{25}\text{ClN}_3$  498.1737, found 498.1732.

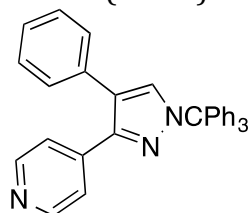

**5d**

**4-(4-phenyl-1-trityl-1H-pyrazol-3-yl)pyridine, 5d.** 4-(4-bromo-1-trityl-1H-pyrazol-3-yl)pyridine (100 mg, 0.22 mmol) and bromobenzene (21 mL, 0.22 mmol) were reacted respectively, following general procedure. Product obtained as a white solid (65 mg, 65%). Mp: 238–242 °C;  $^1\text{H}$  NMR (500 MHz, Chloroform- $d_3$ )  $\delta$  8.48 (d,  $J$  = 6.2 Hz, 2H), 7.43 (d,  $J$  = 6.2 Hz, 2H), 7.40 (s, 1H), 7.37 – 7.34 (m, 12H), 7.35 (d,  $J$  = 7.8 Hz, 2H), 7.33 – 7.30 (m, 1H), 7.27 – 7.24 (m, 3H), 7.25 (t,  $J$  = 7.6 Hz, 2H);  $^{13}\text{C}$  NMR (126 MHz, Chloroform- $d_3$ )  $\delta$  149.70, 148.23, 142.96, 142.34, 141.20, 140.70, 138.47, 133.34, 130.32, 128.97, 128.56, 127.90, 127.76, 122.38, 99.99; LC-MS:  $t_{\text{R}}$  = 3.67 min;  $m/z$ : 464 ( $\text{M} + \text{H}$ ) $^+$  ( $\text{C}_{33}\text{H}_{26}\text{N}_3$ ); HRMS: ( $\text{M} + \text{H}$ ) $^+$  calcd for  $\text{C}_{33}\text{H}_{26}\text{N}_3$  464.2127, found 464.2119.

## 2. NMR Spectra

### 2.1. <sup>1</sup>H NMR

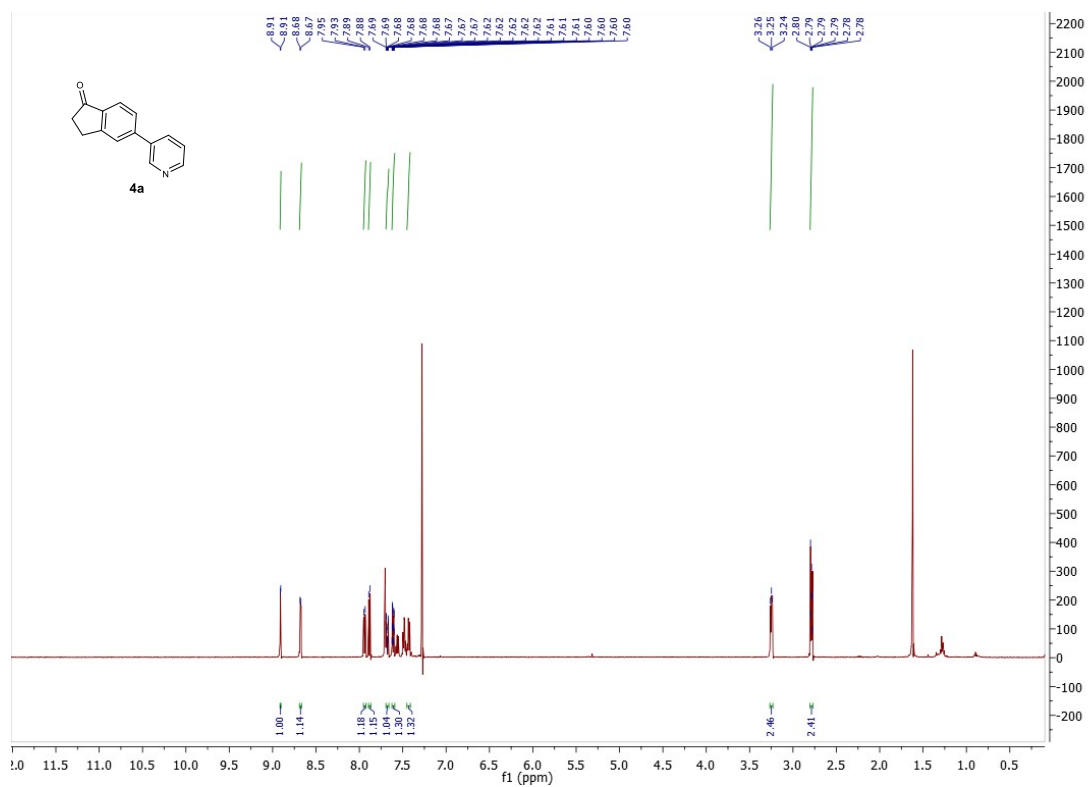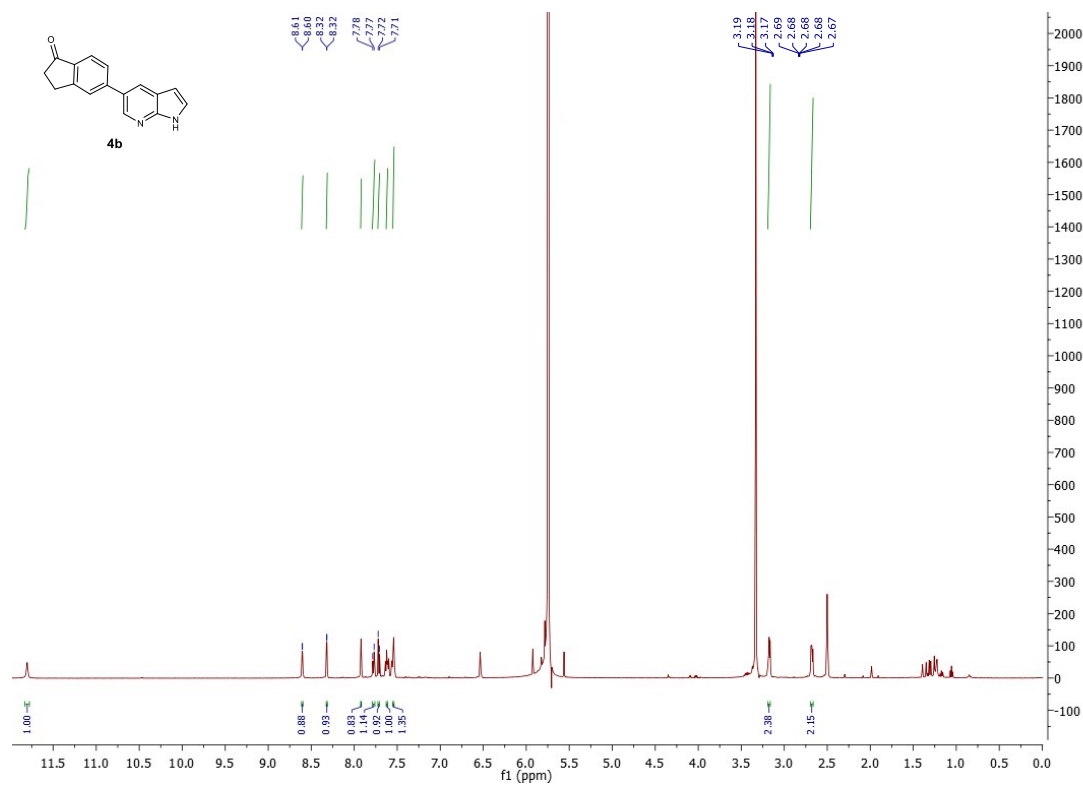

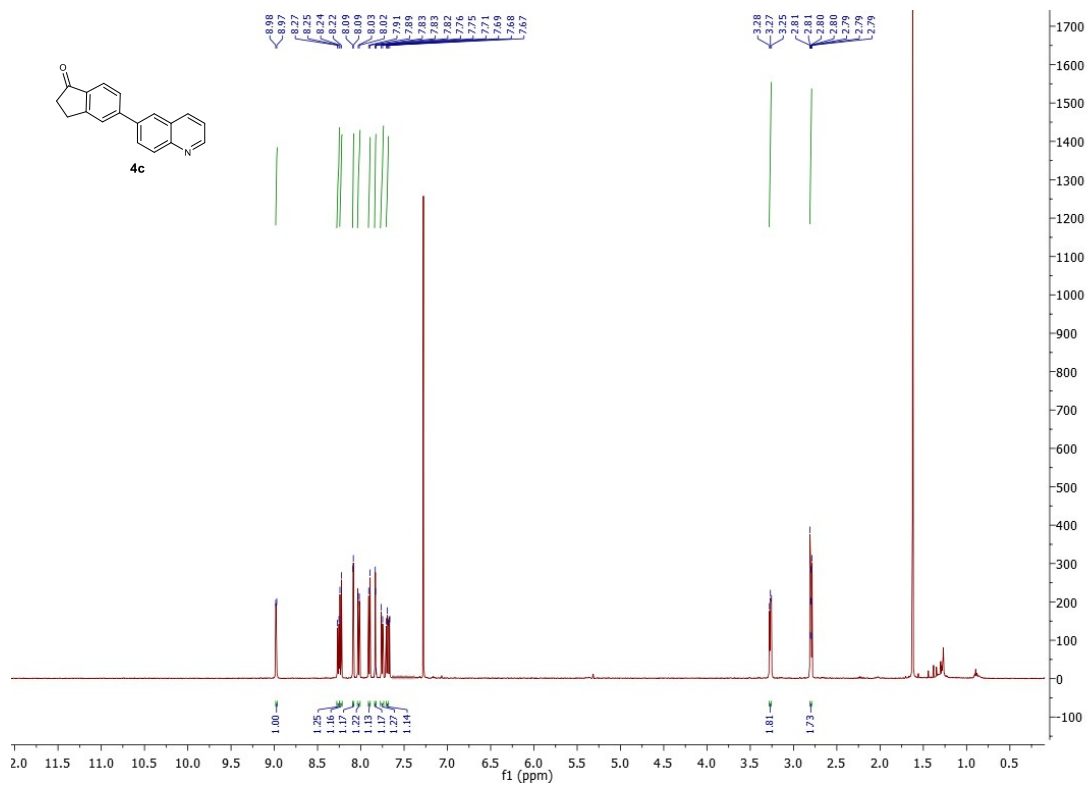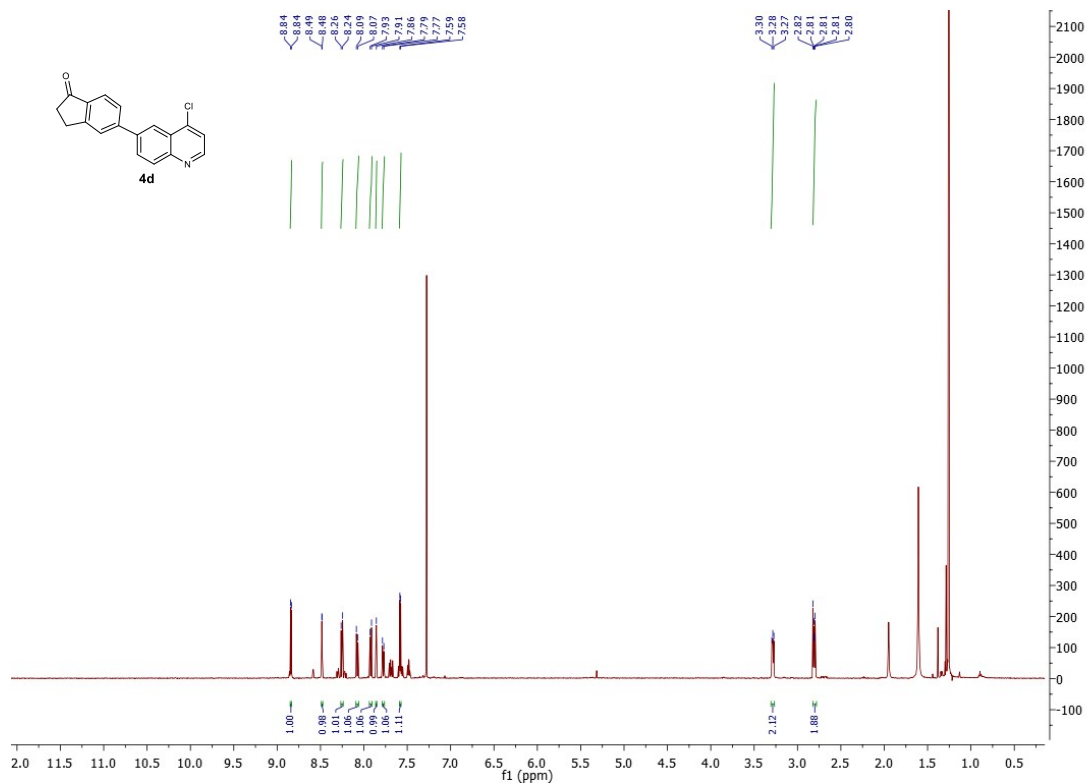

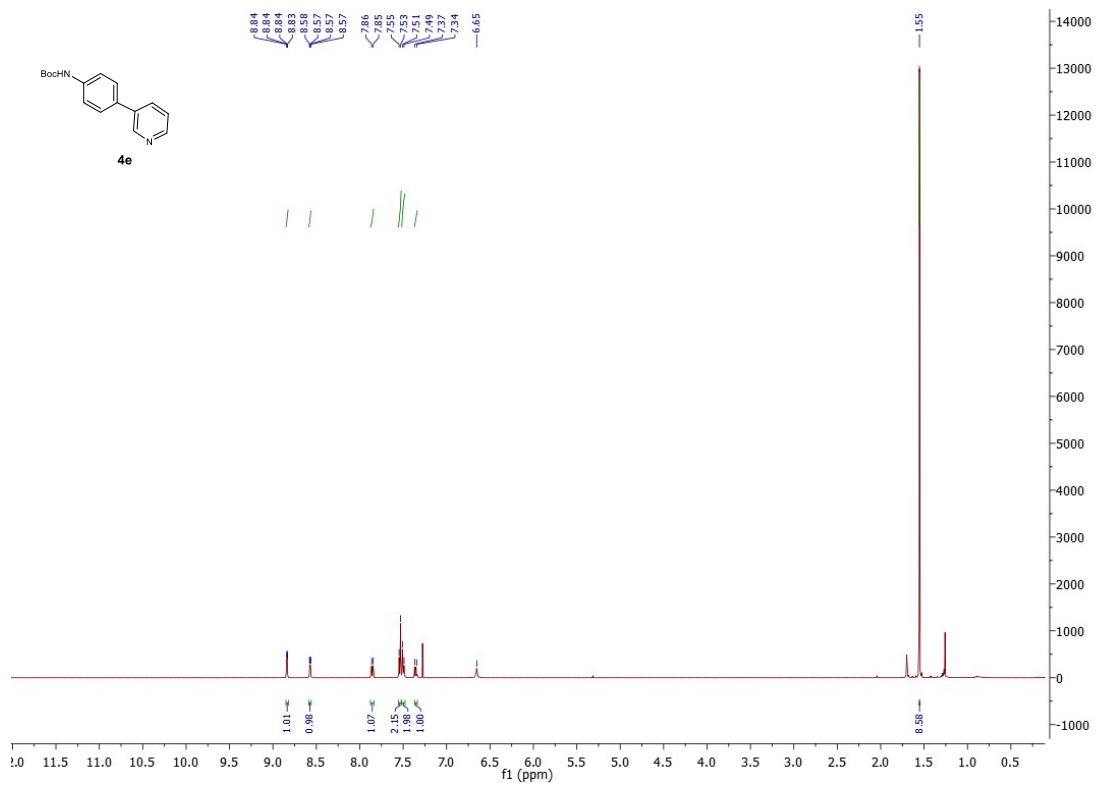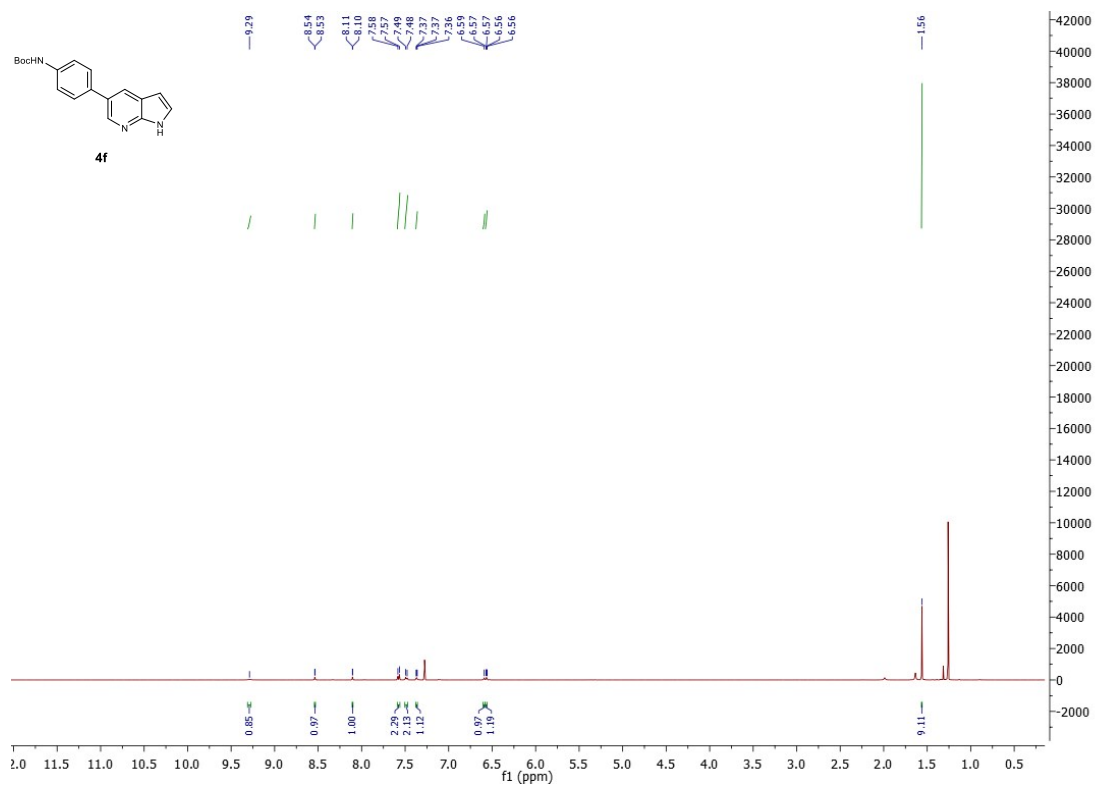

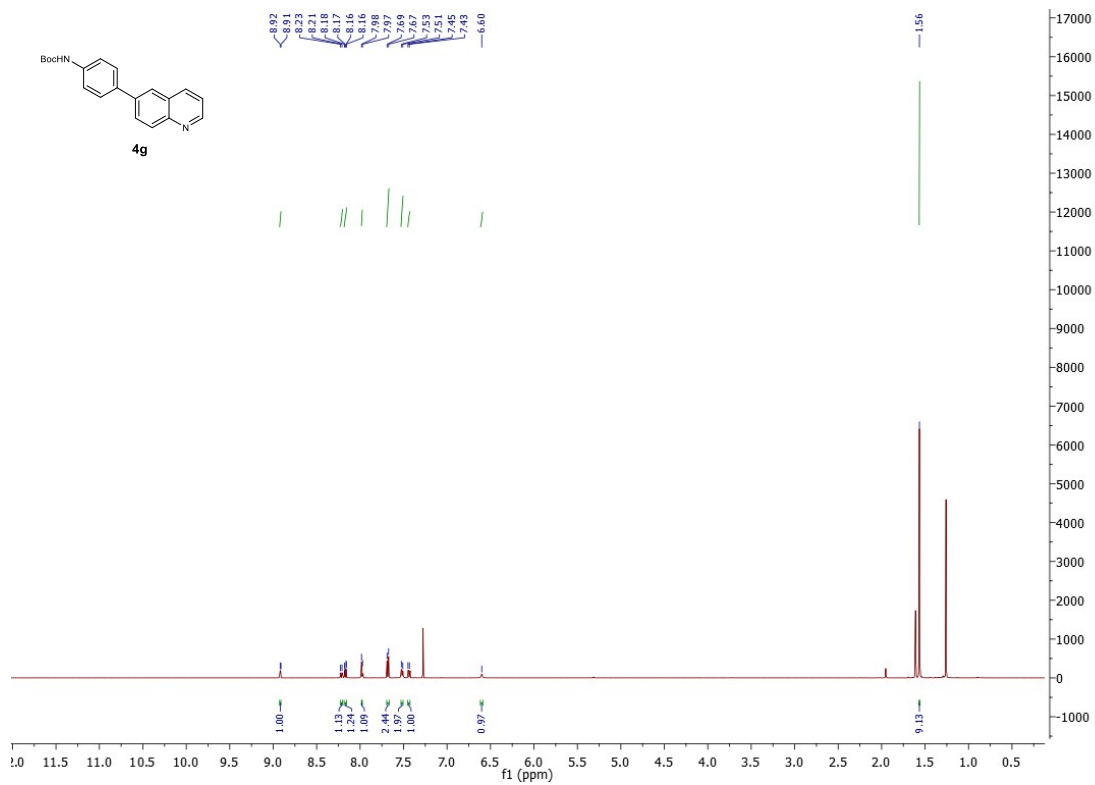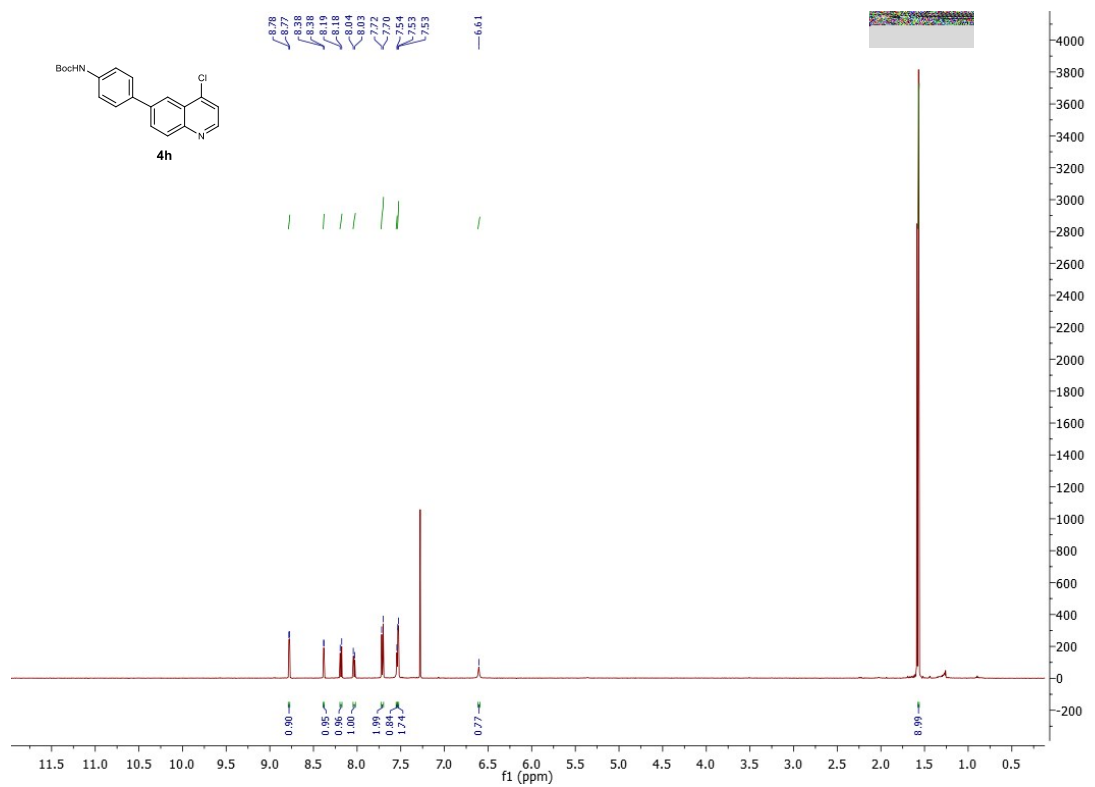

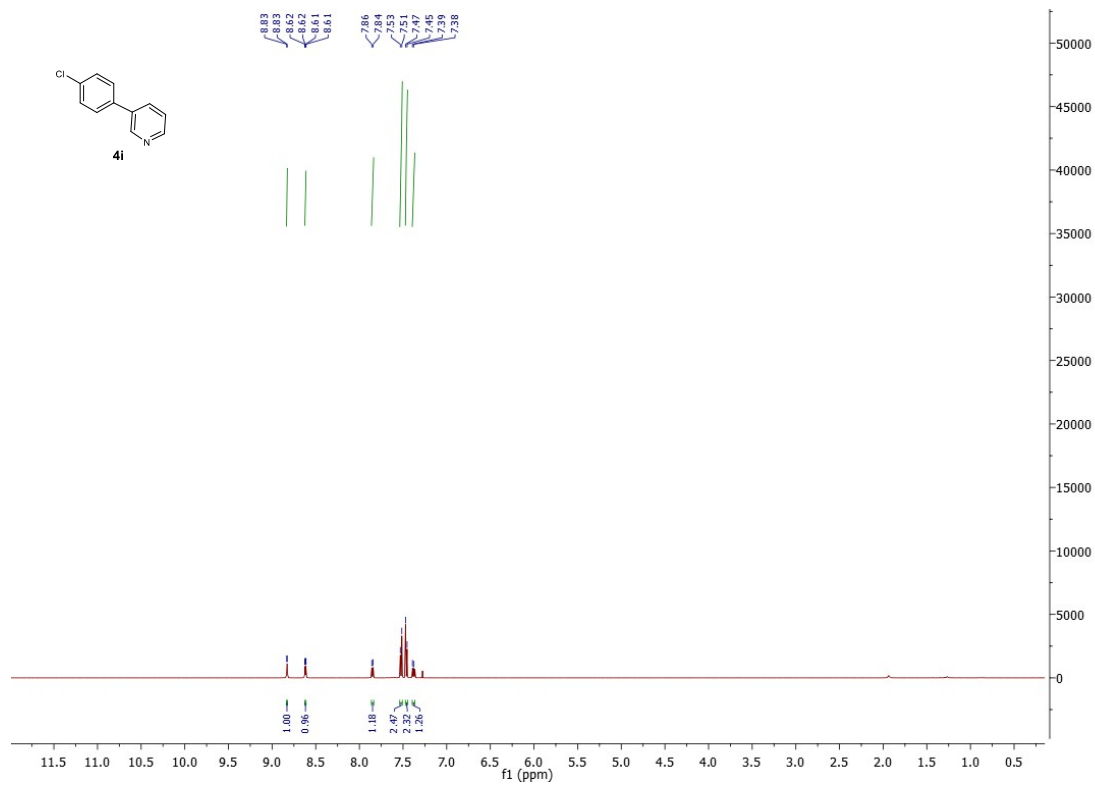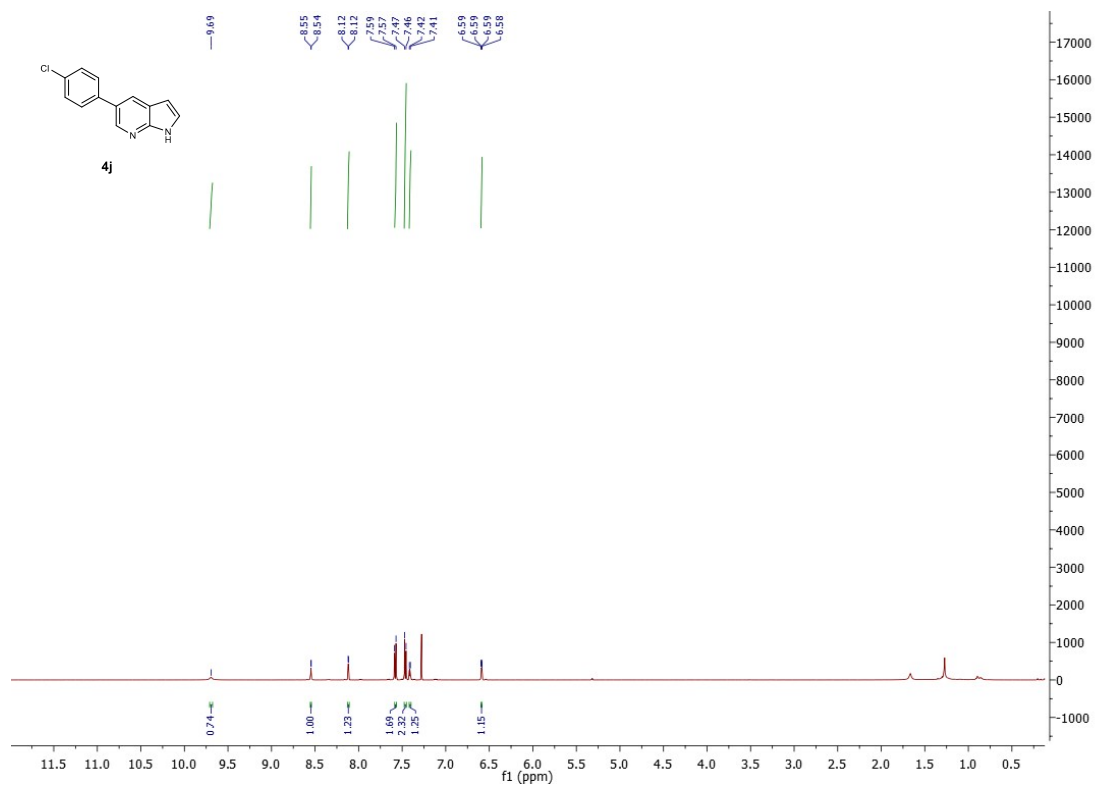

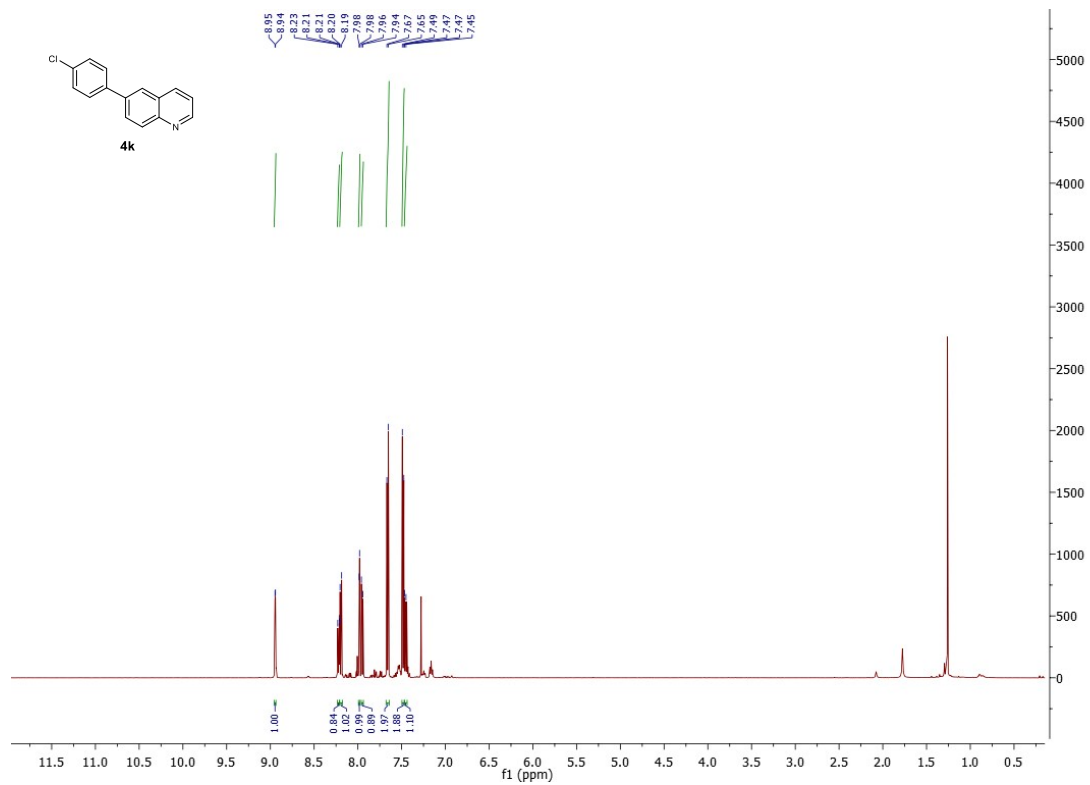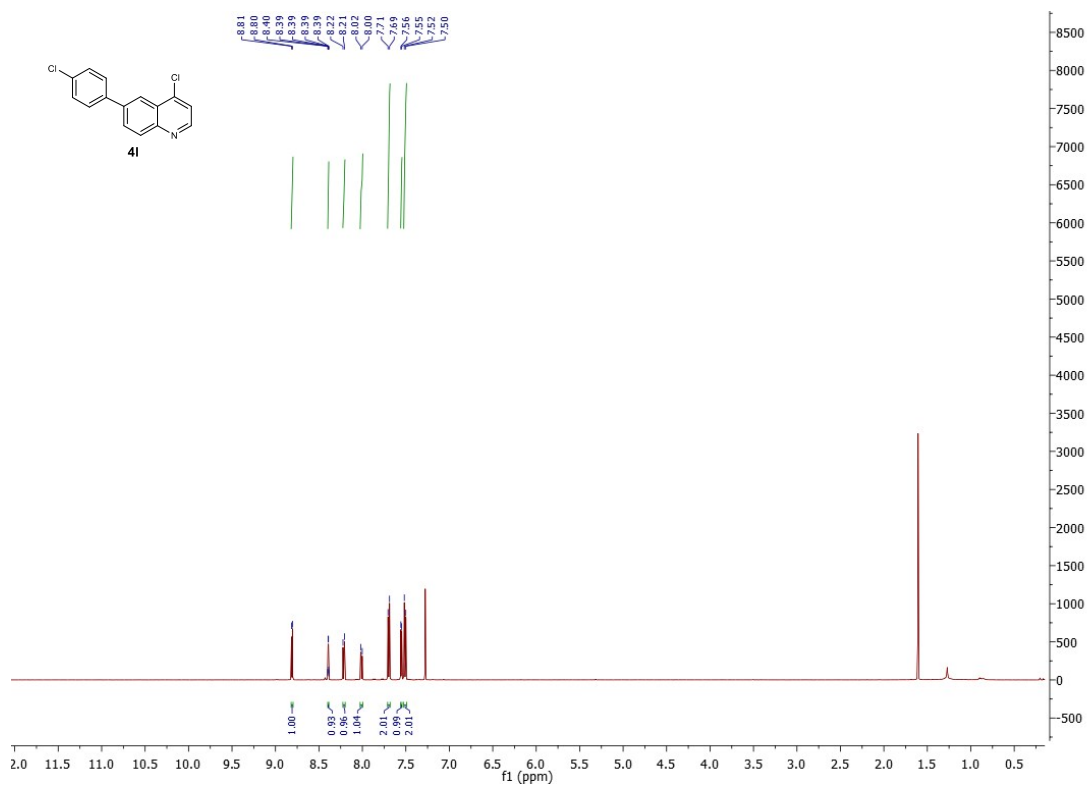



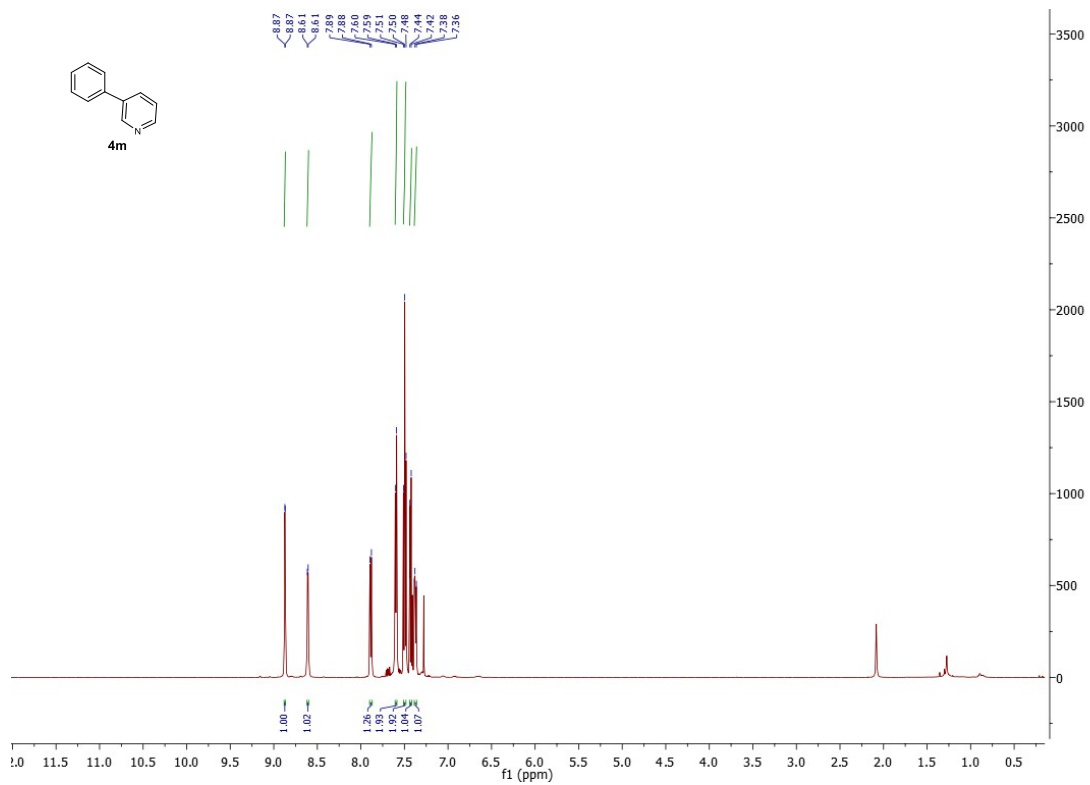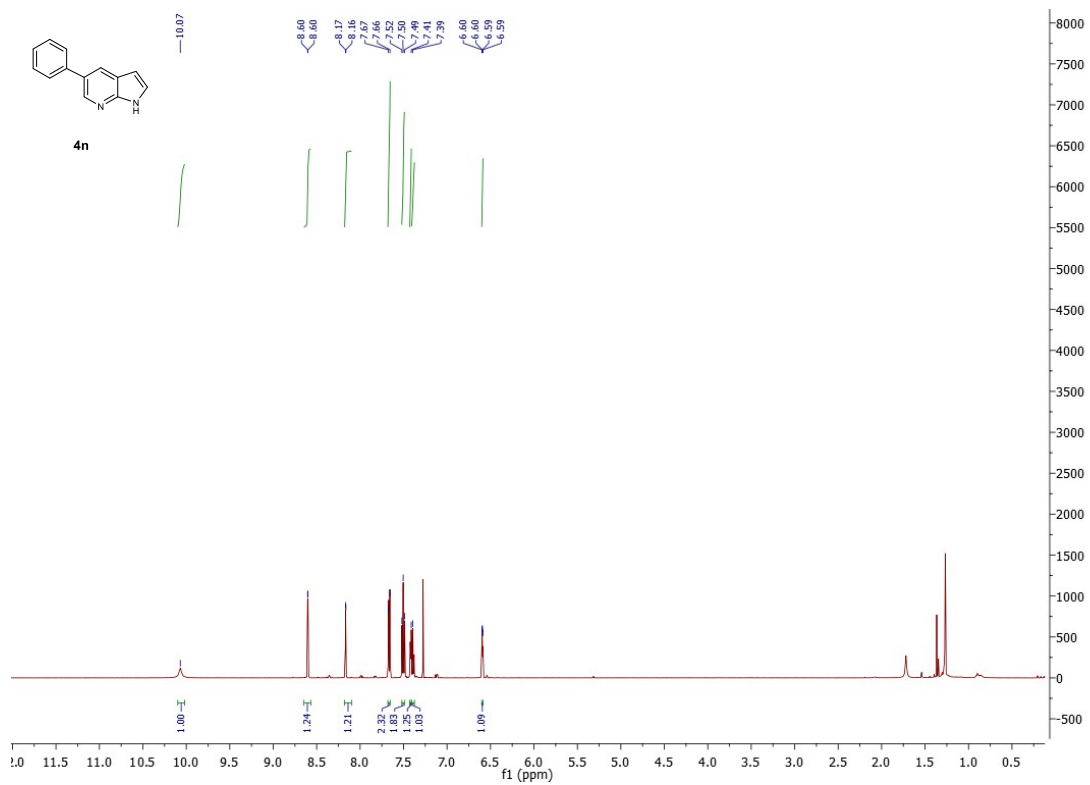

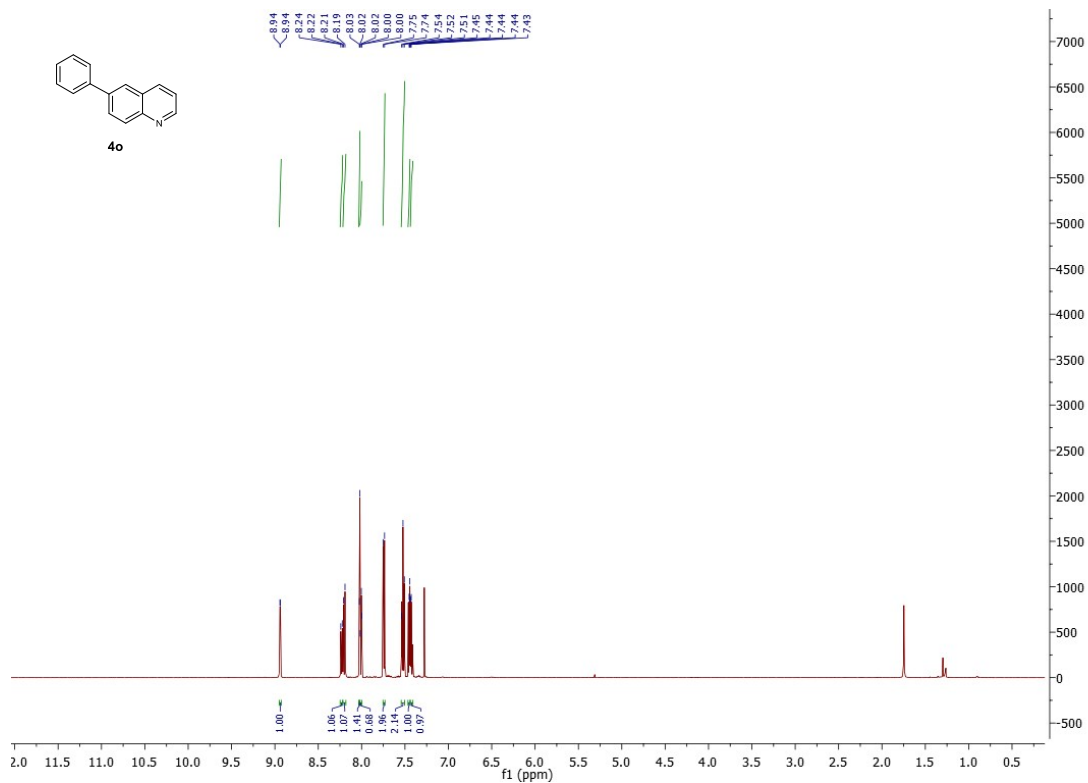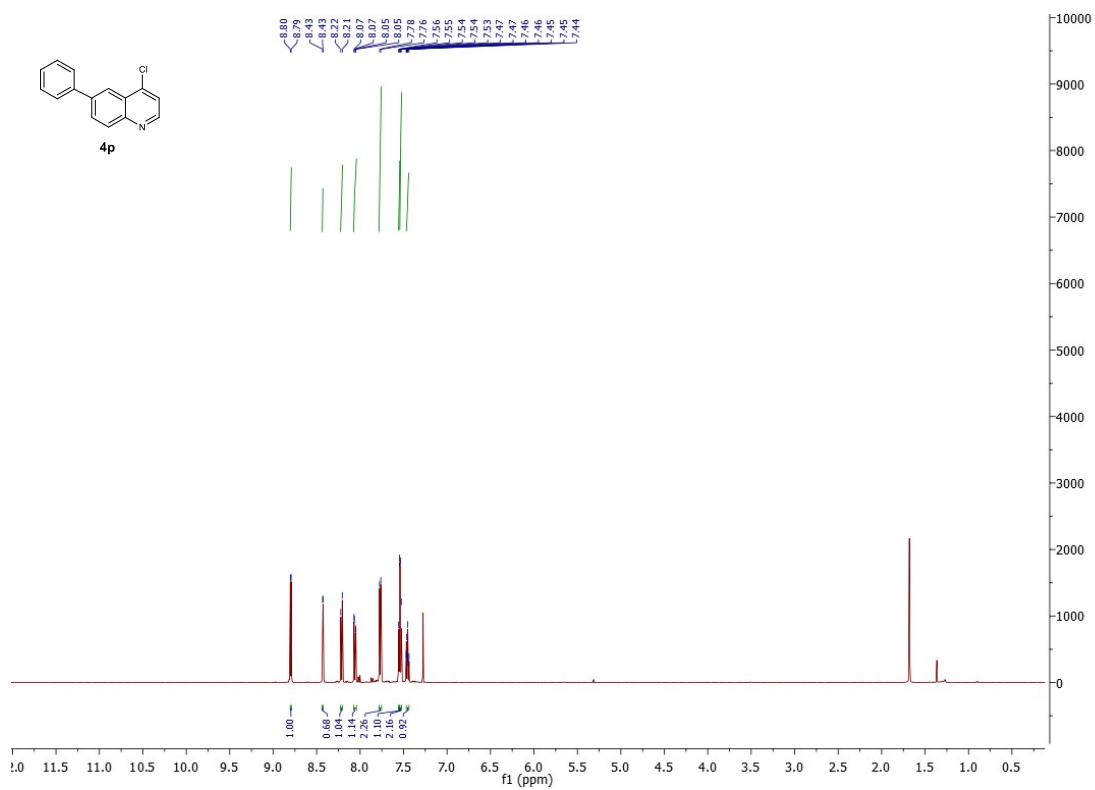

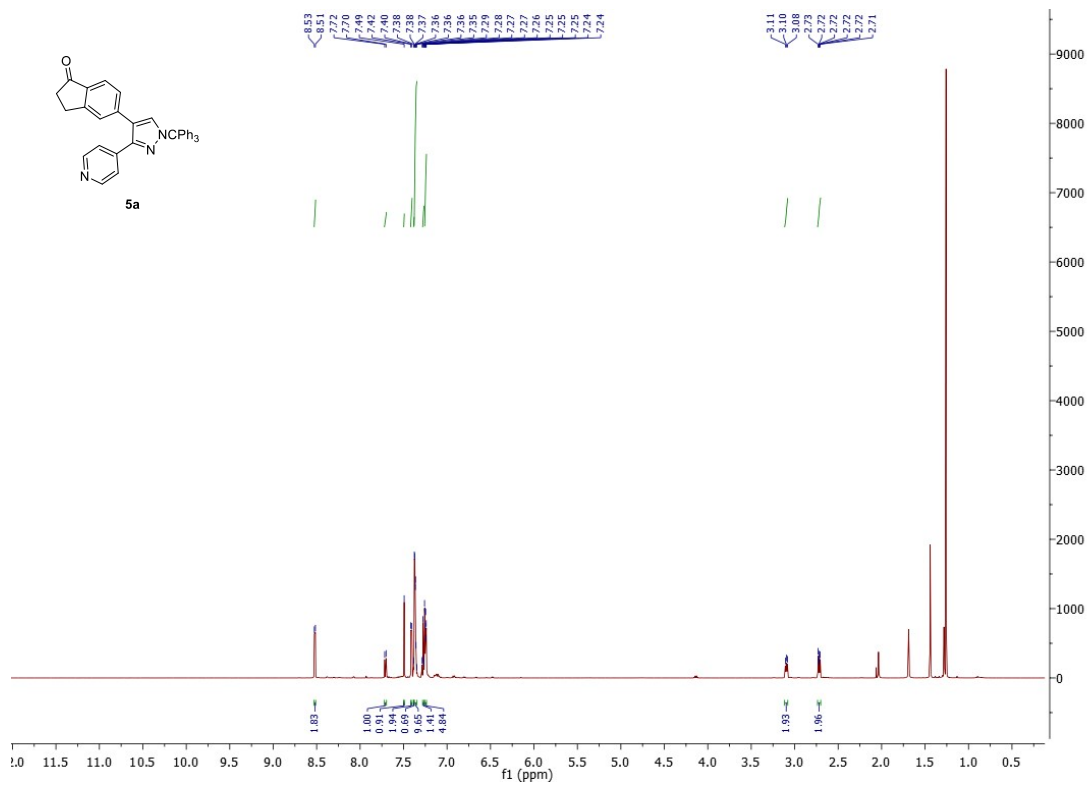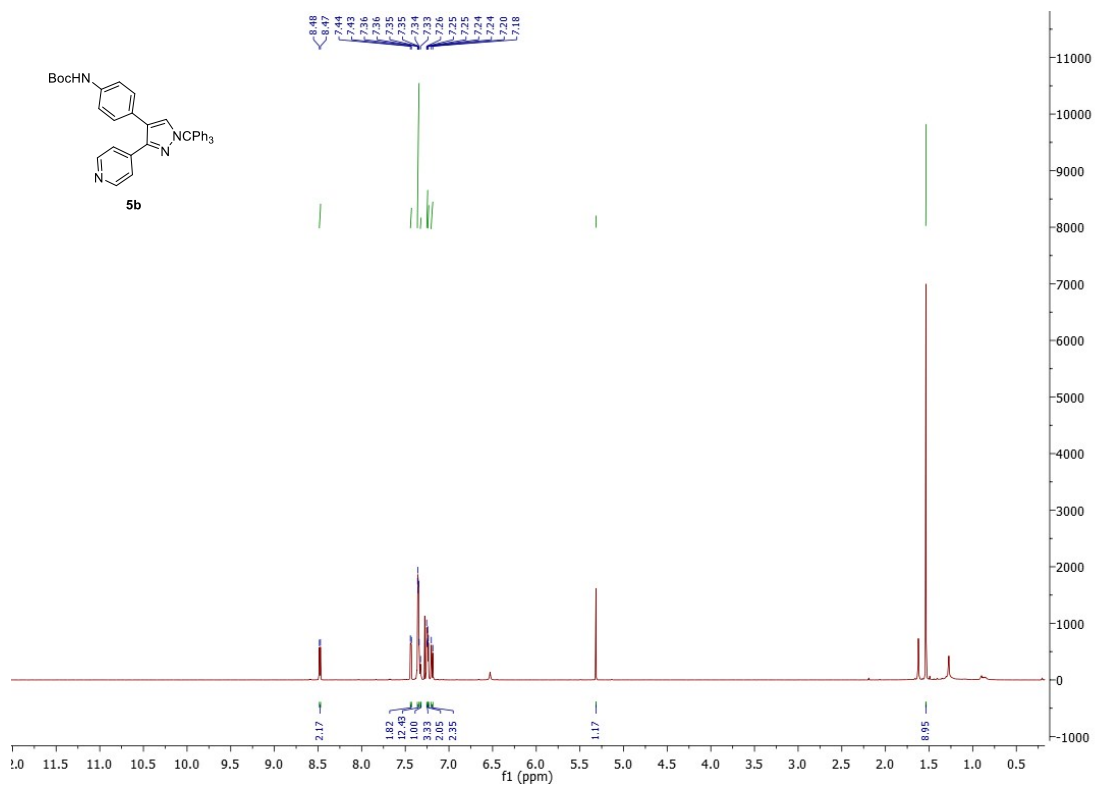

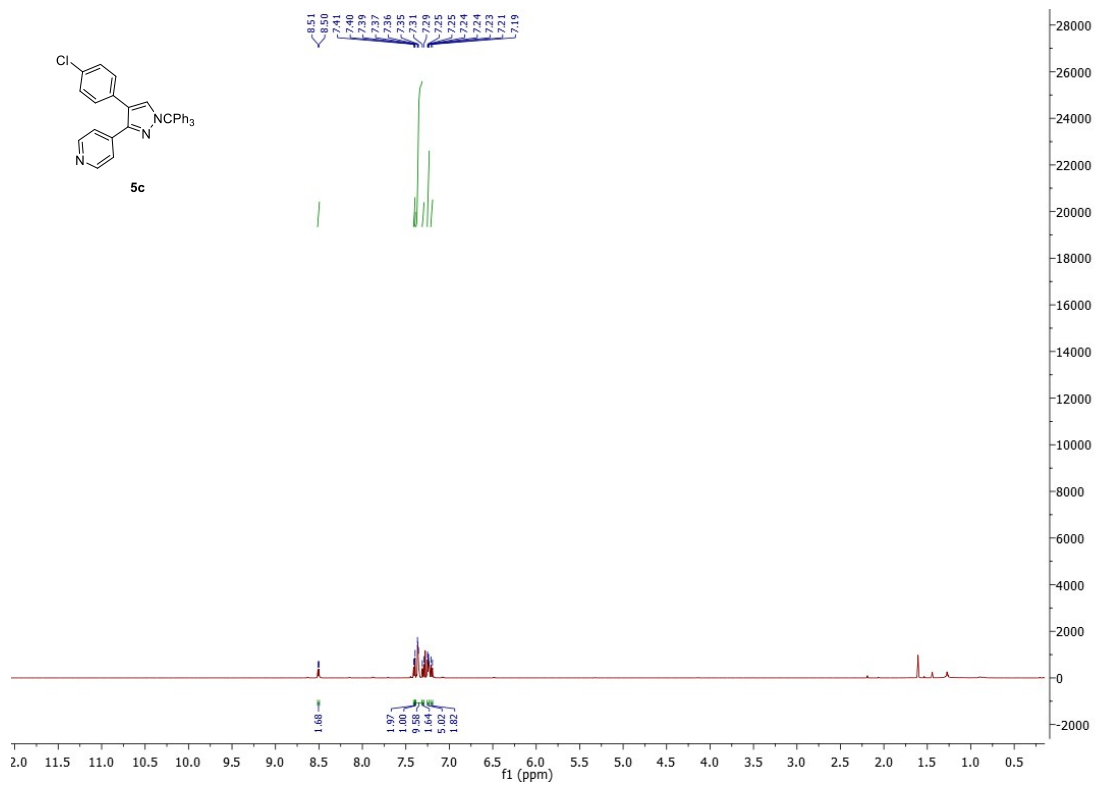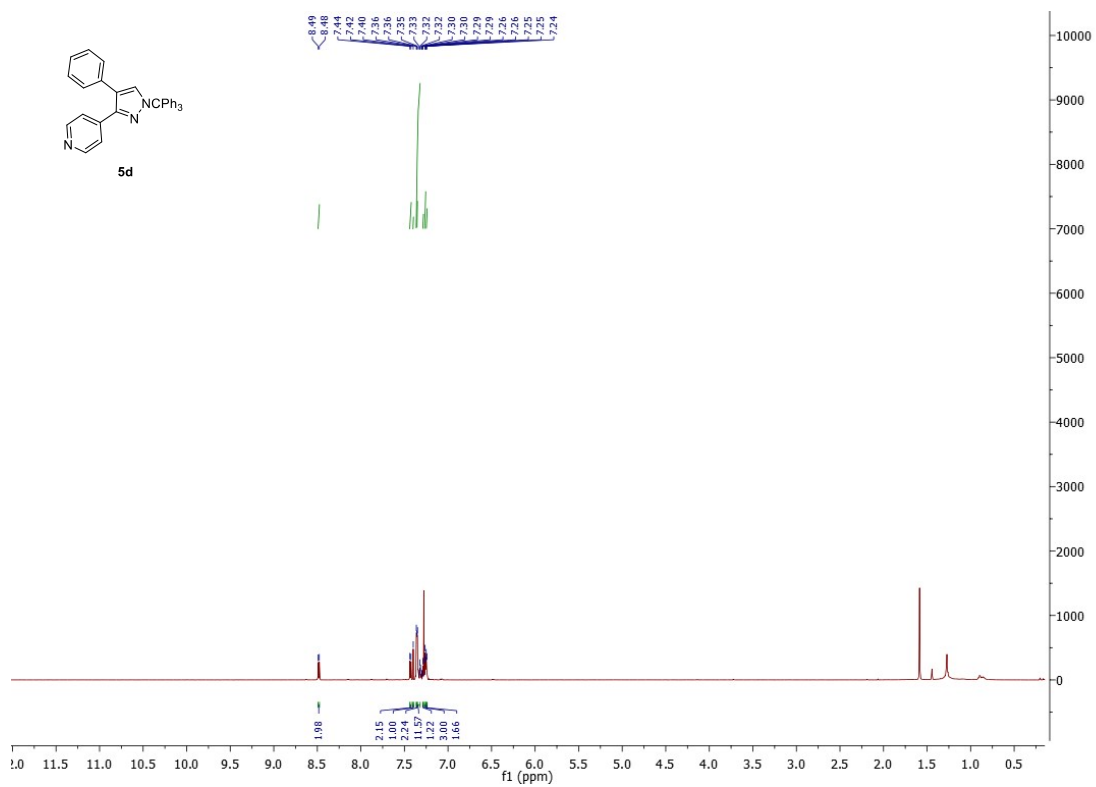

## 2.2. $^{13}\text{C}$ NMR

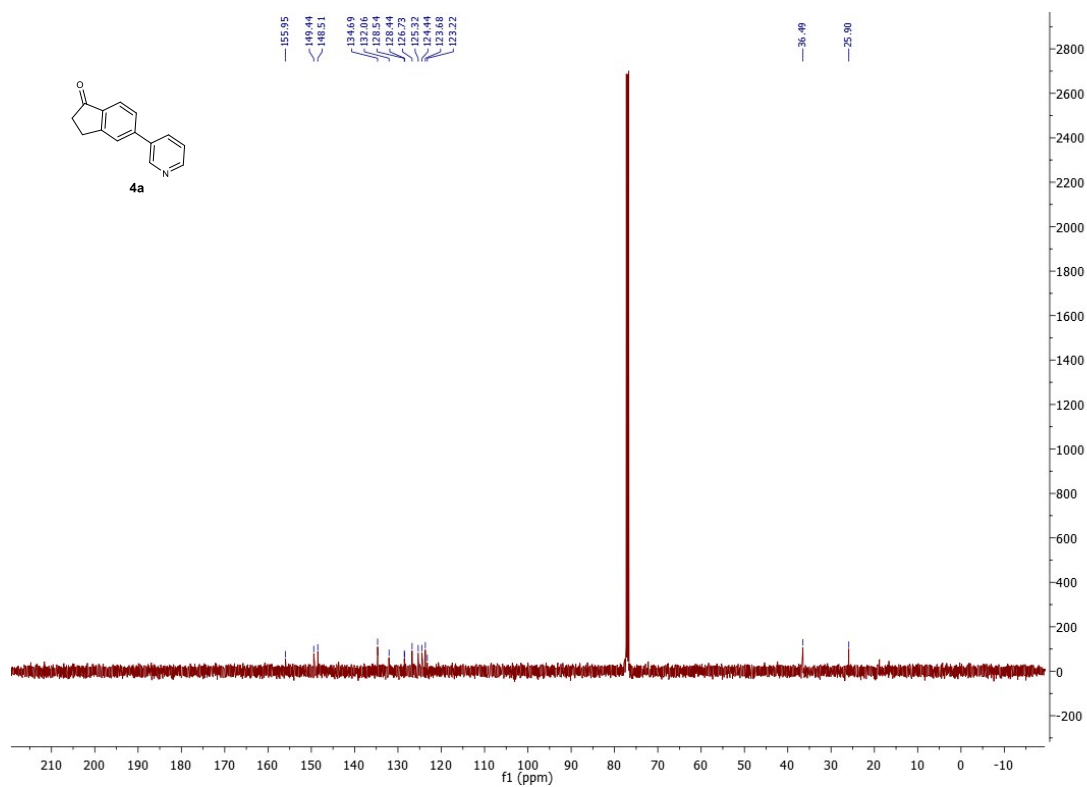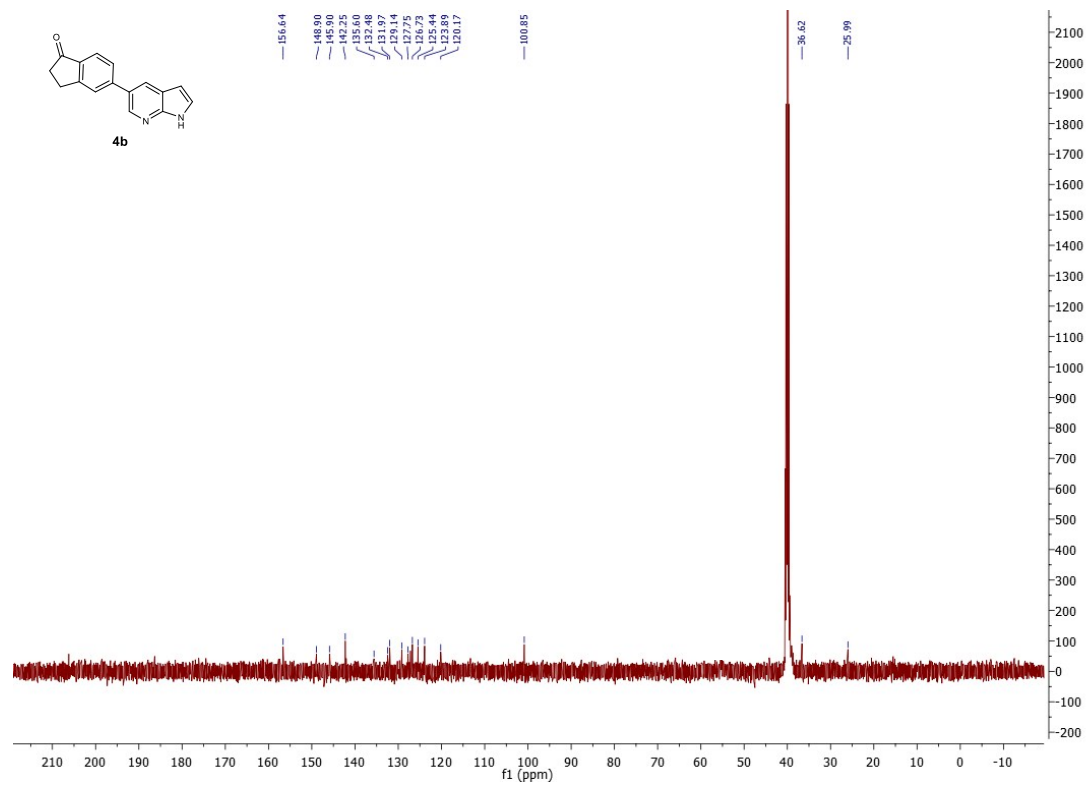

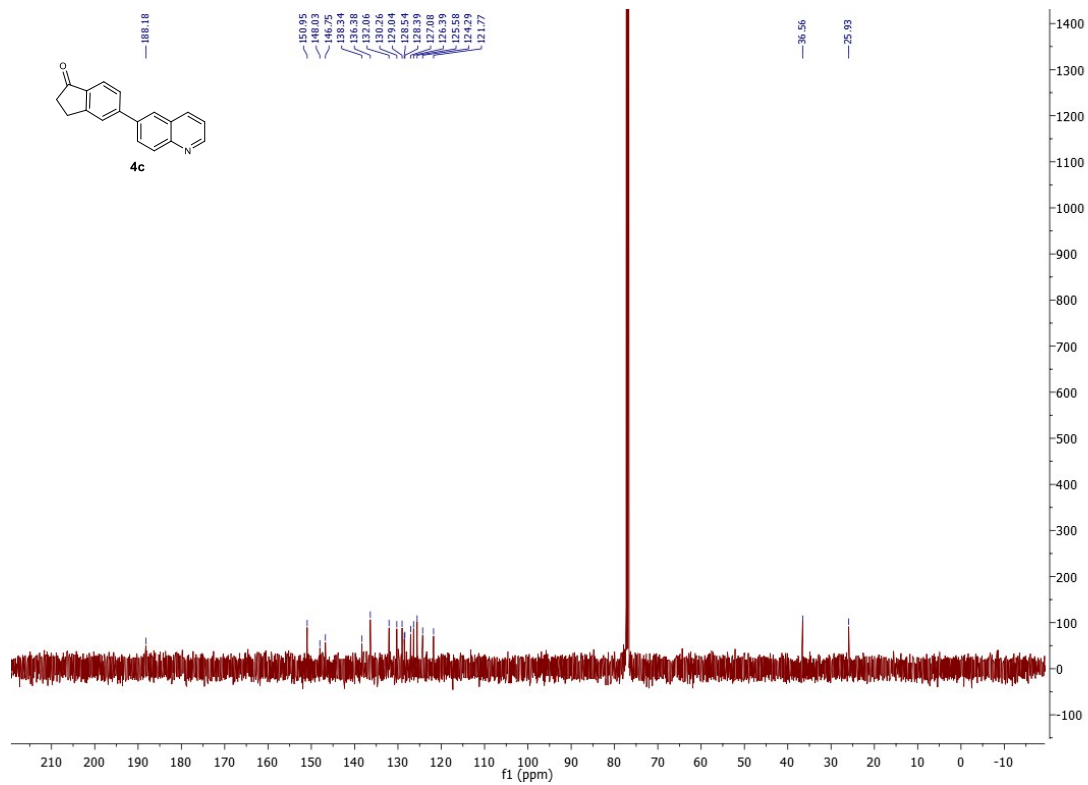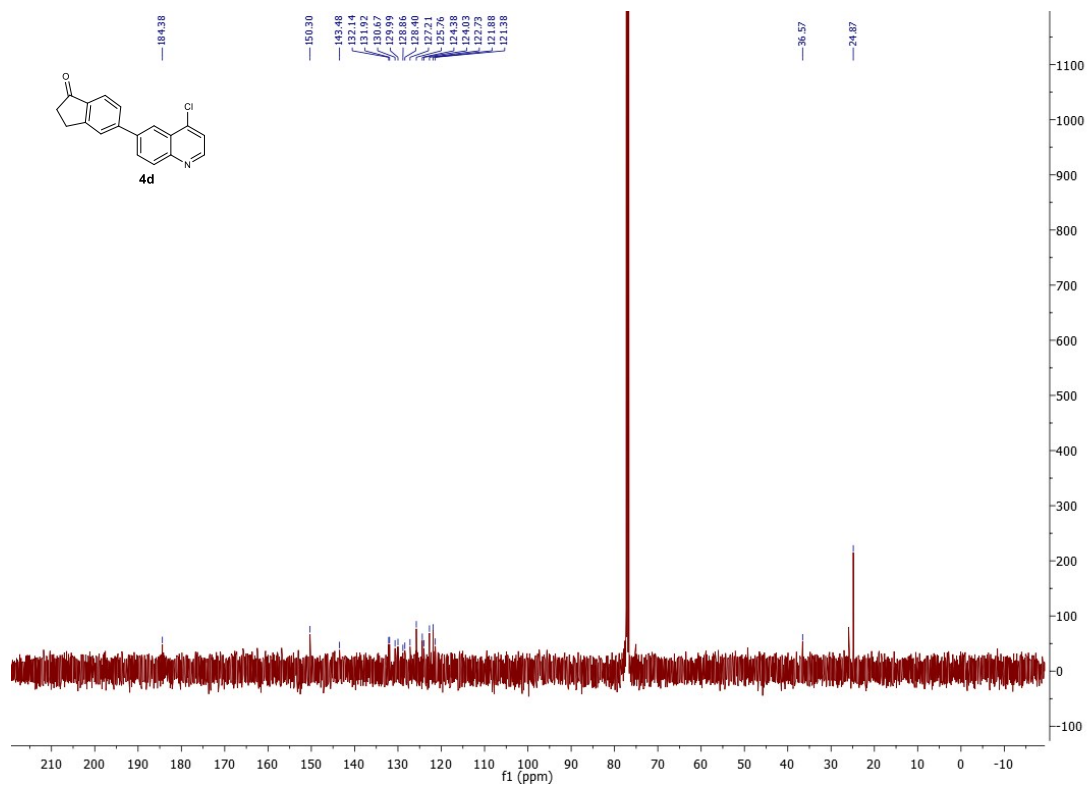

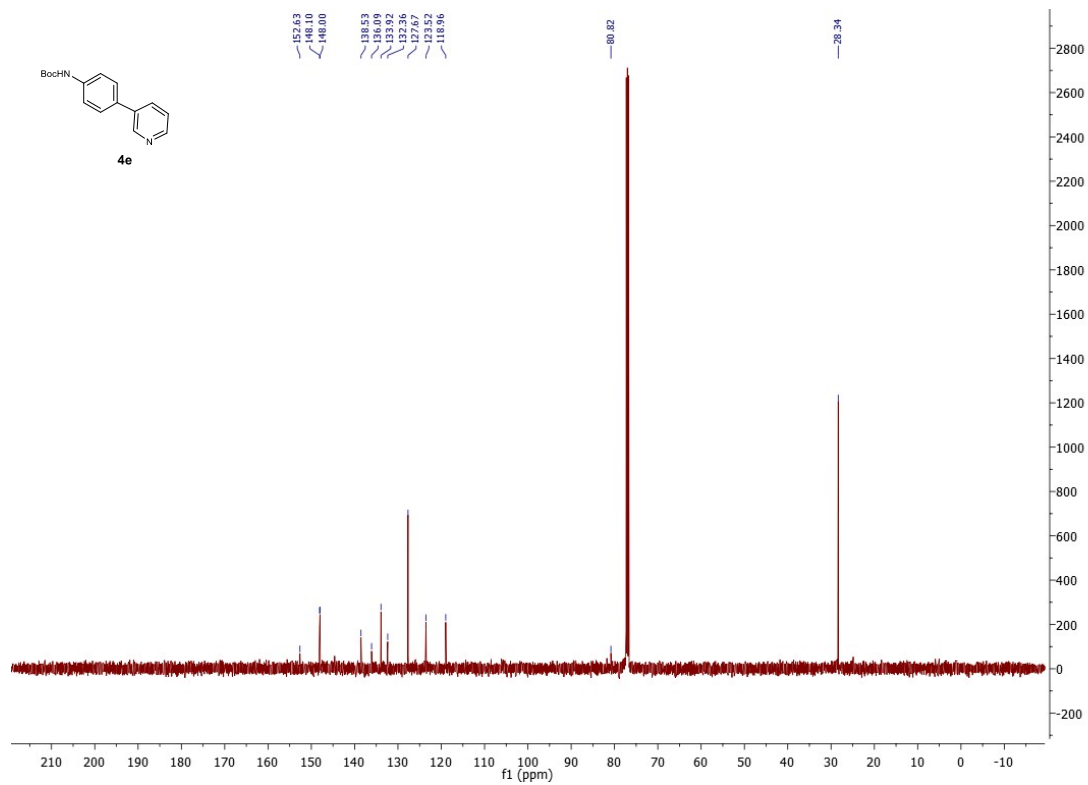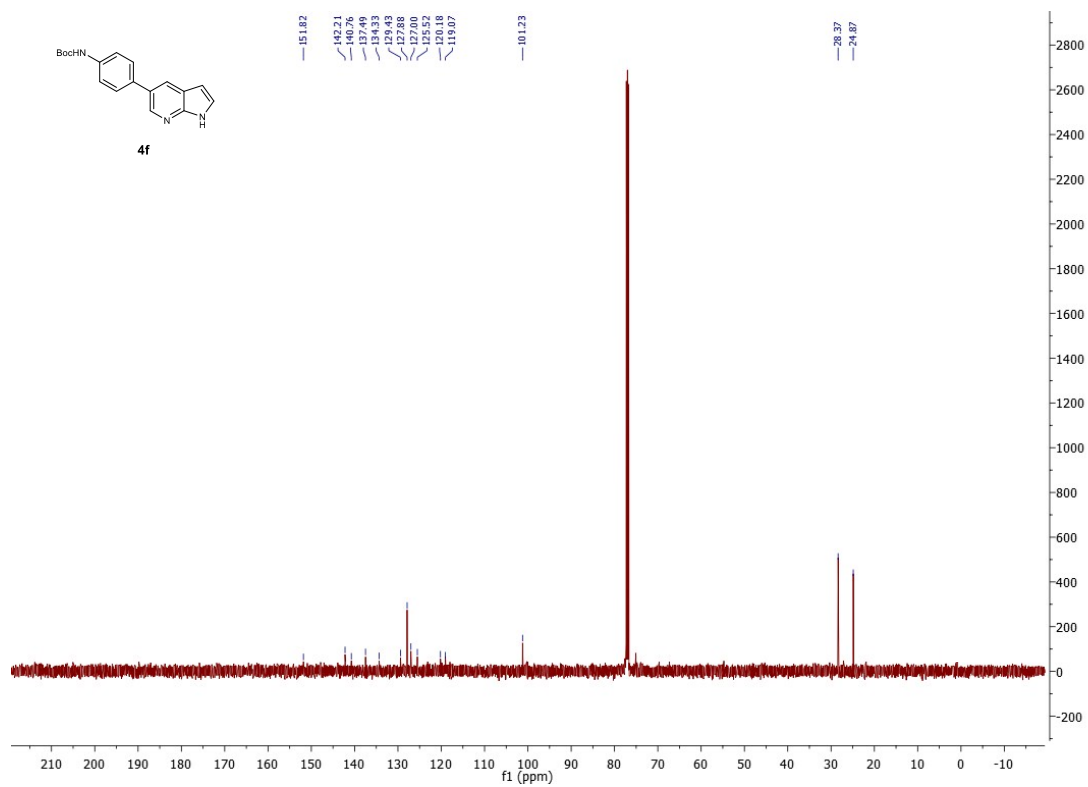

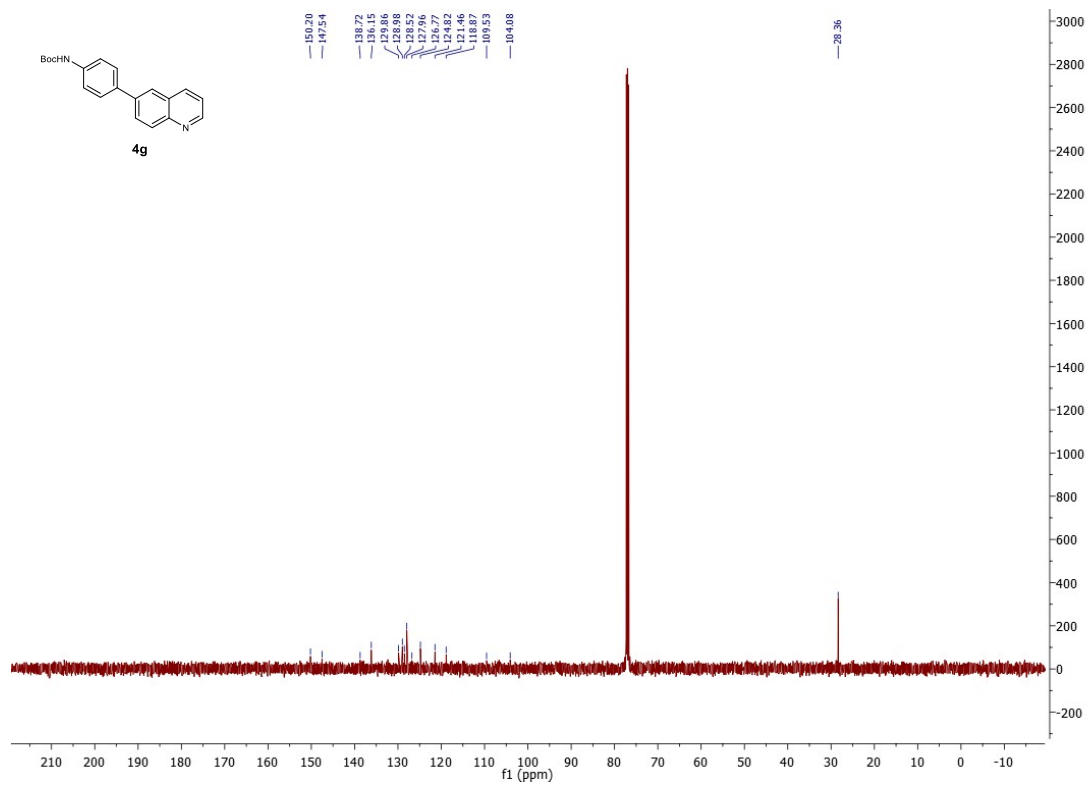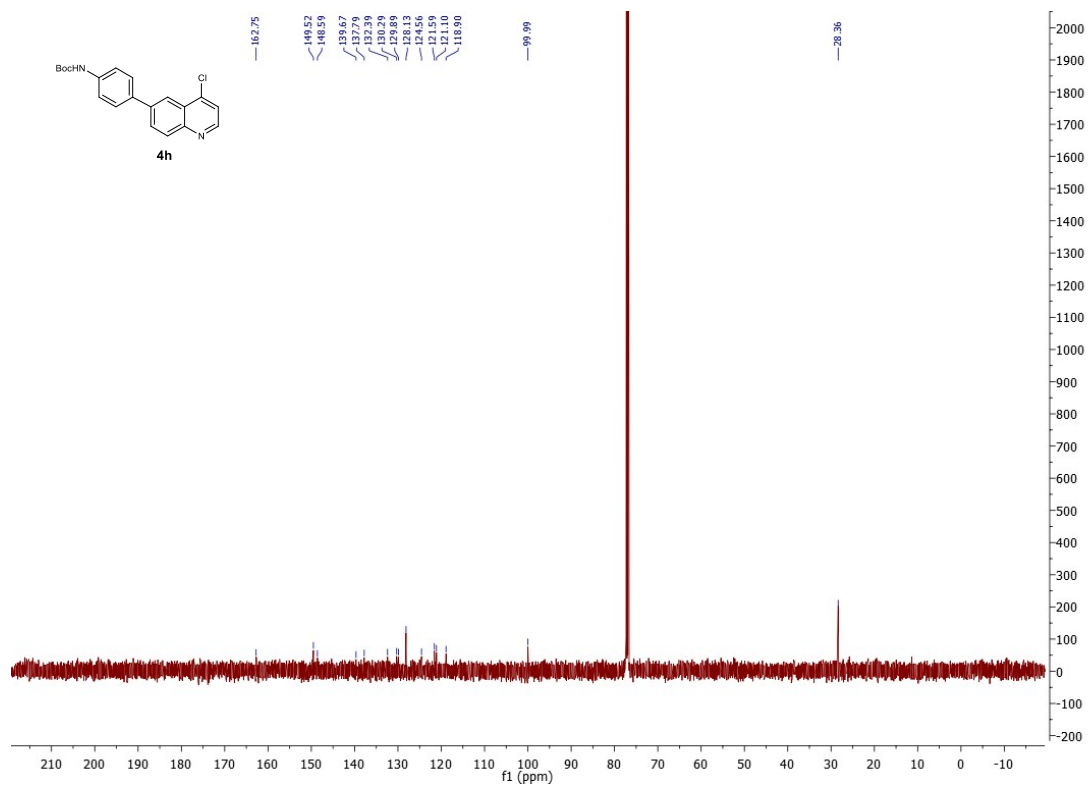



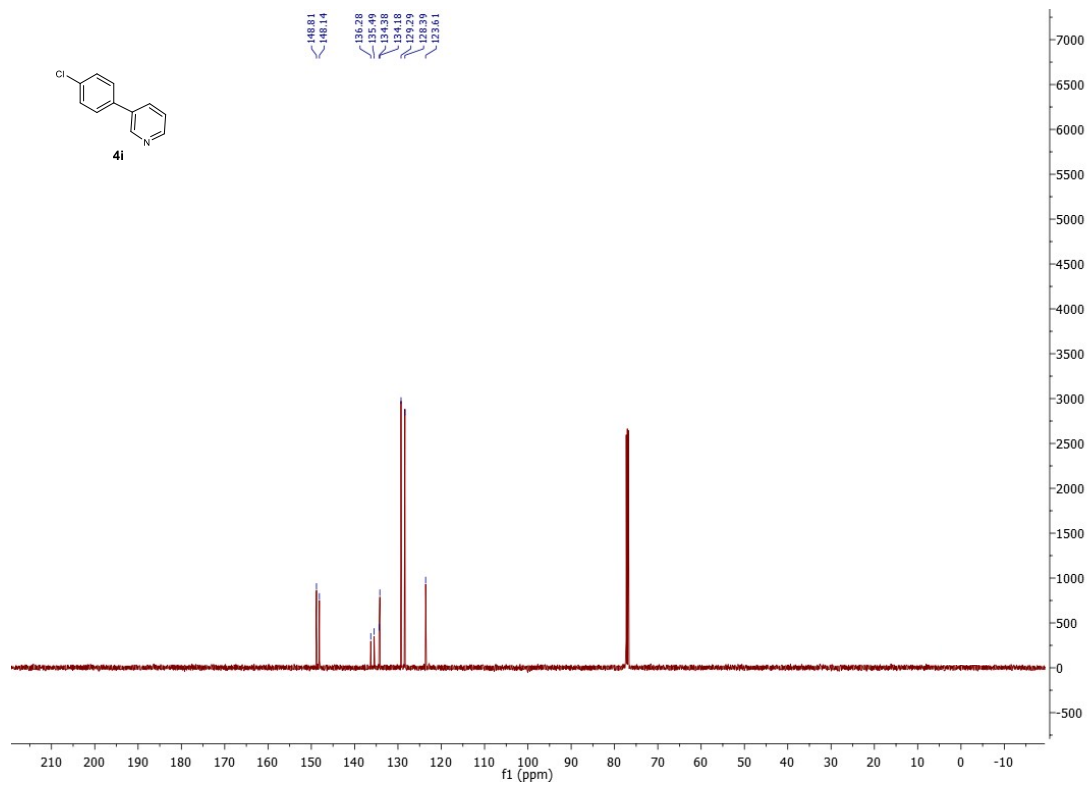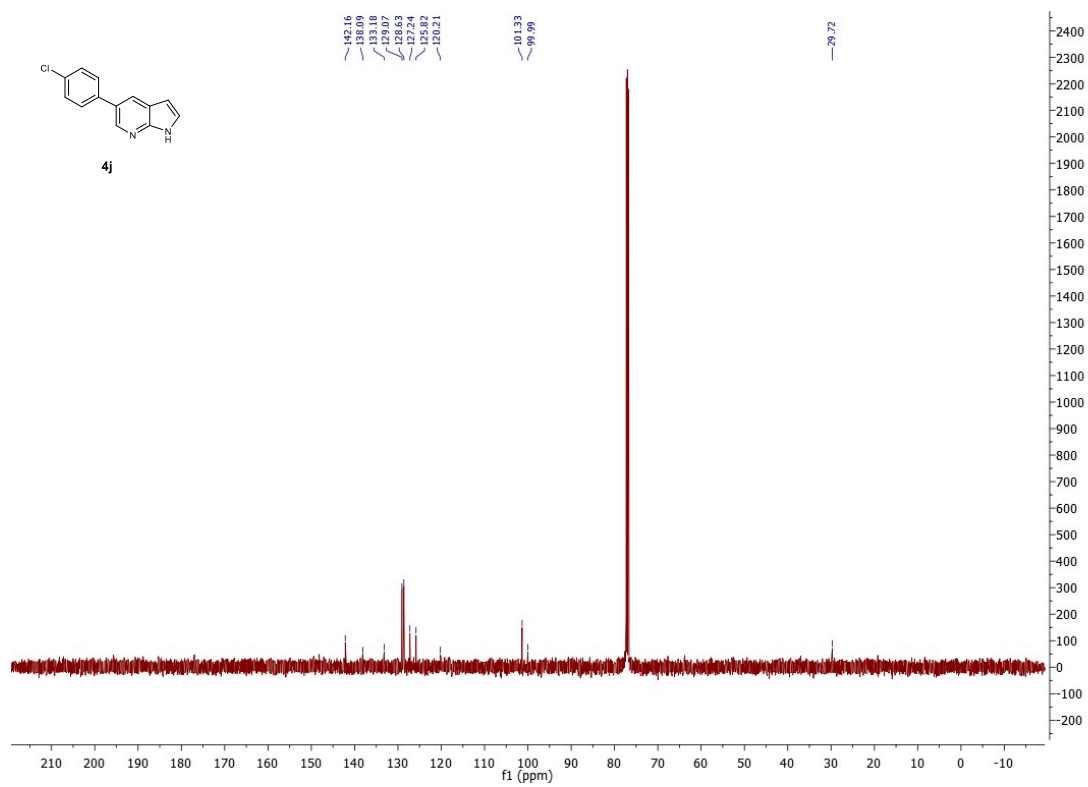

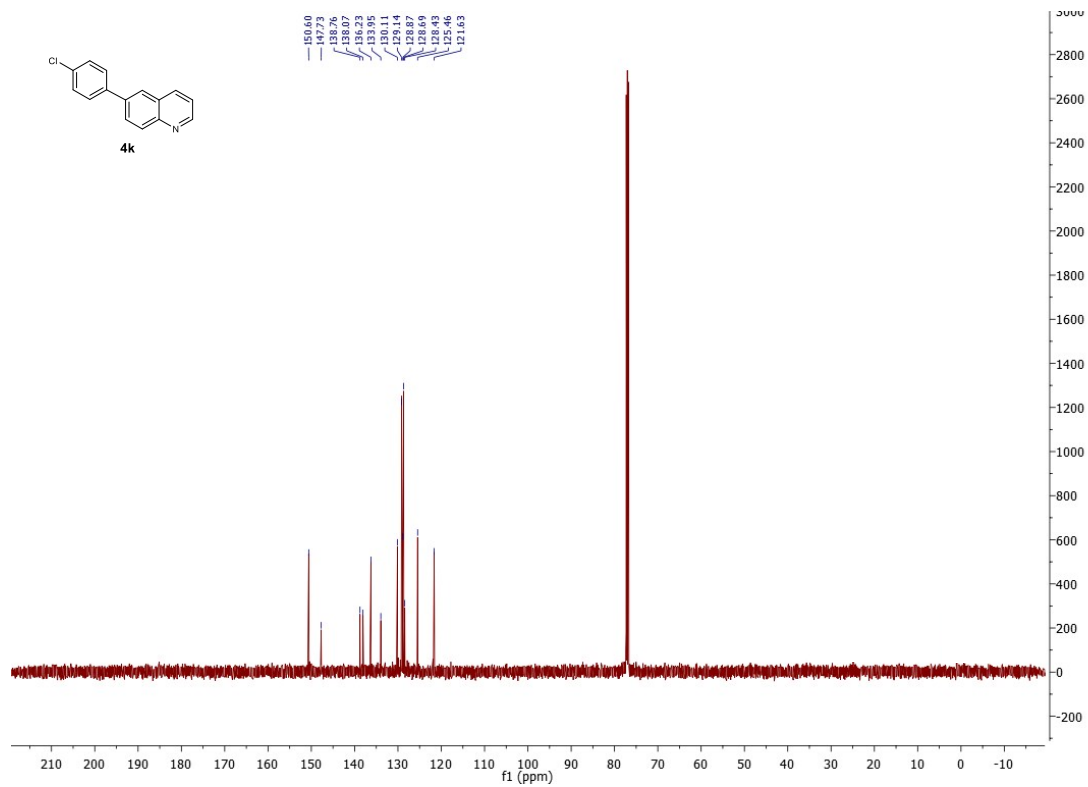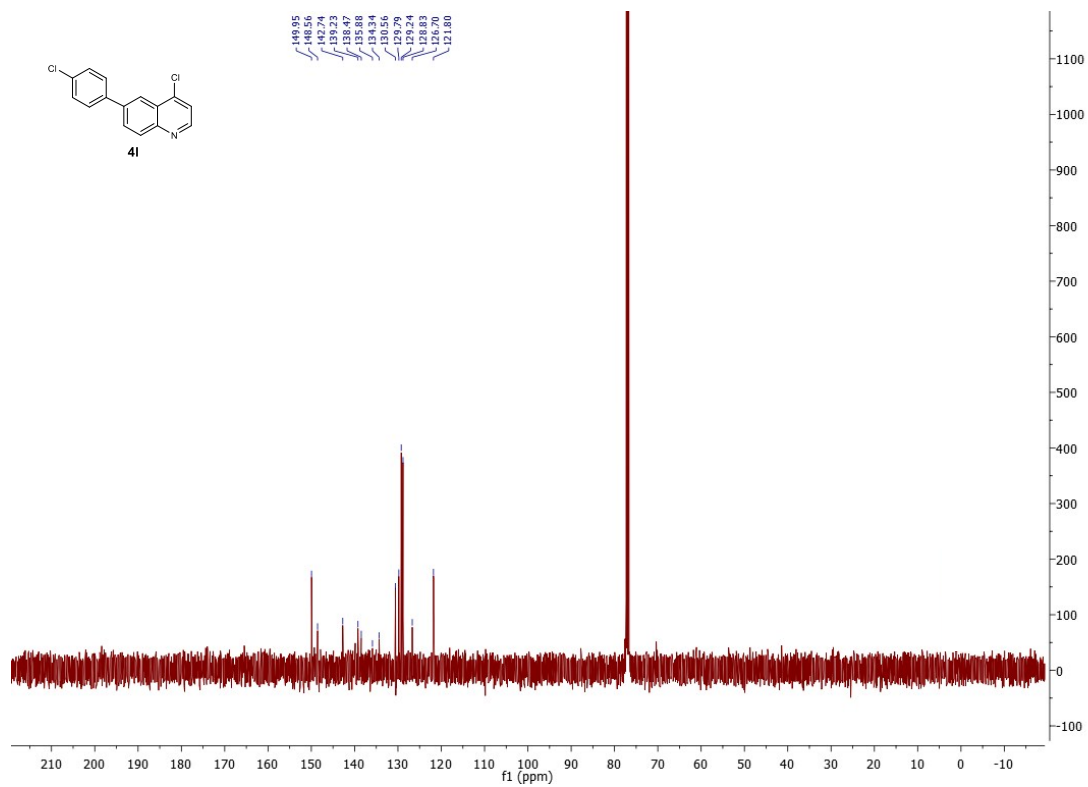

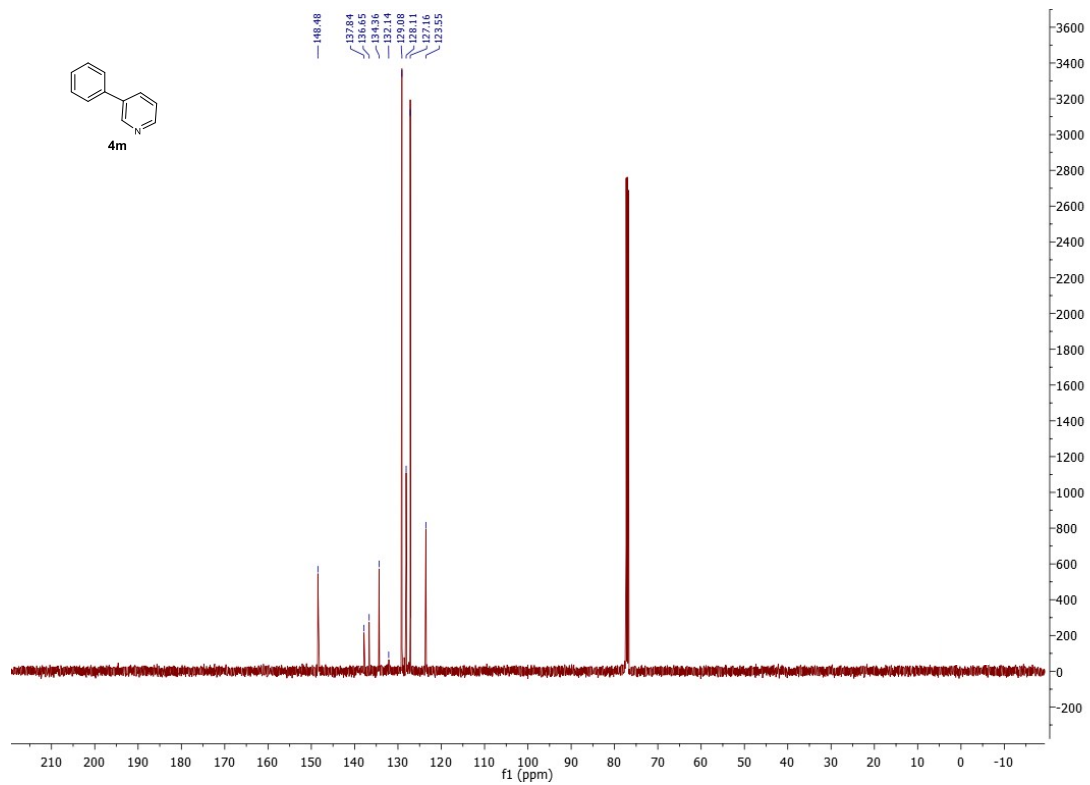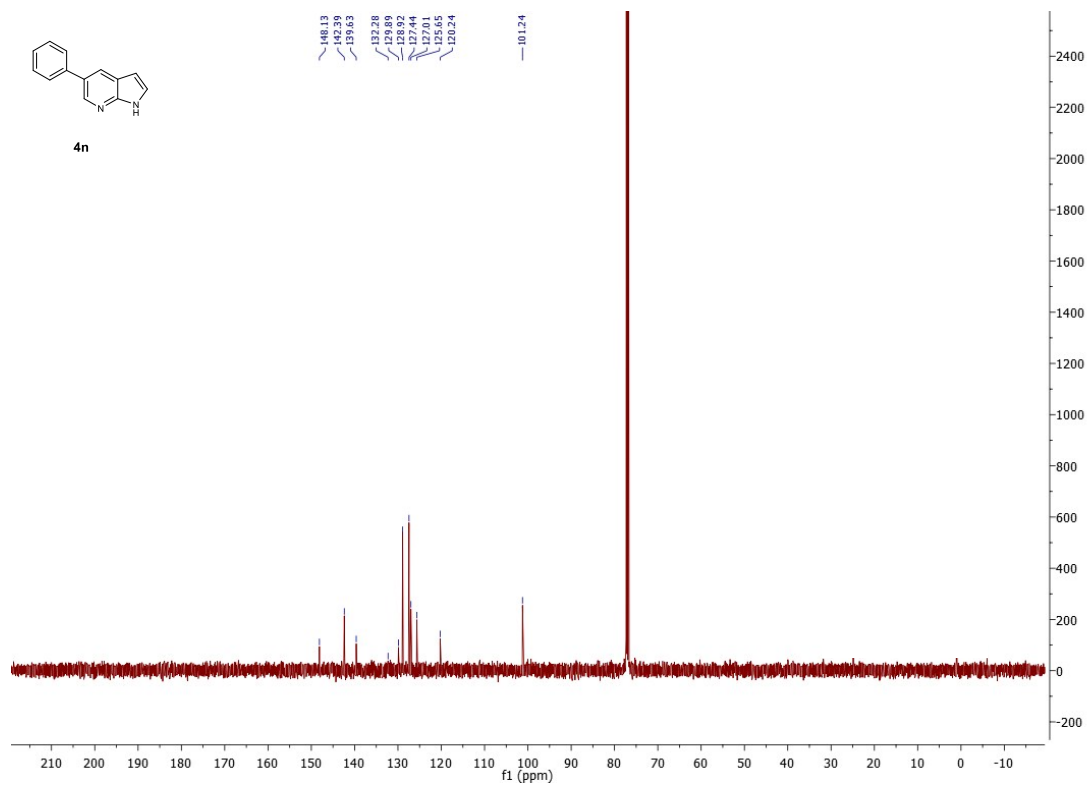

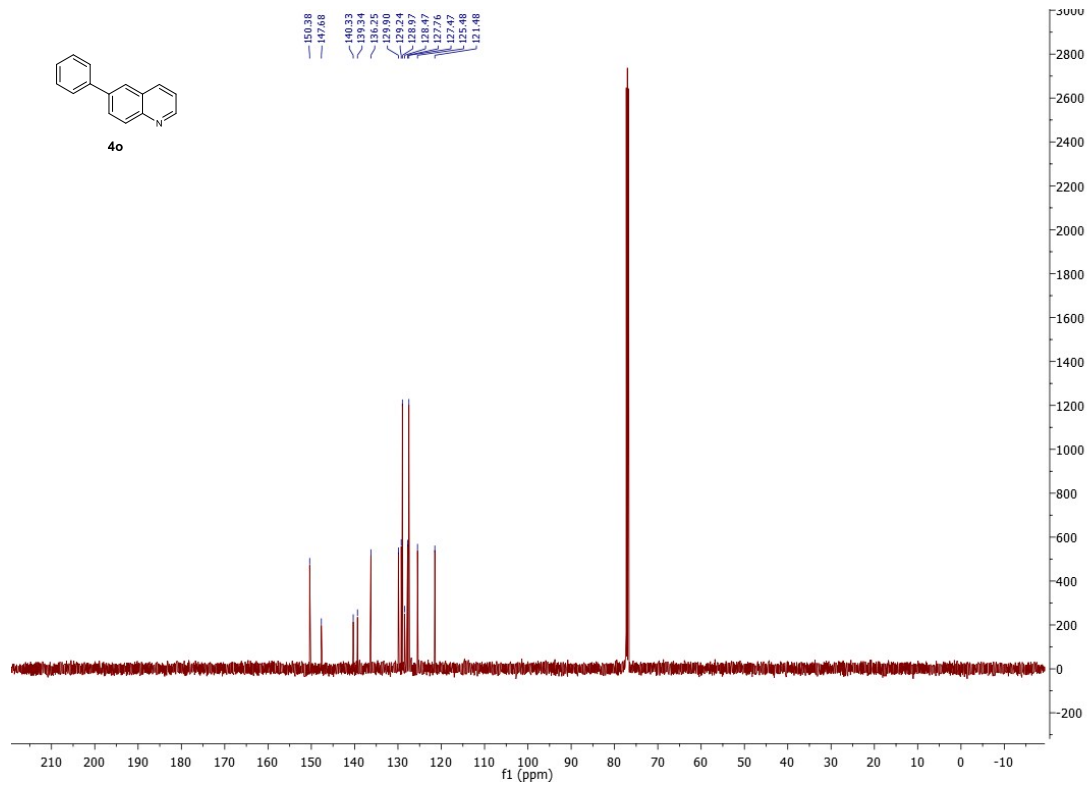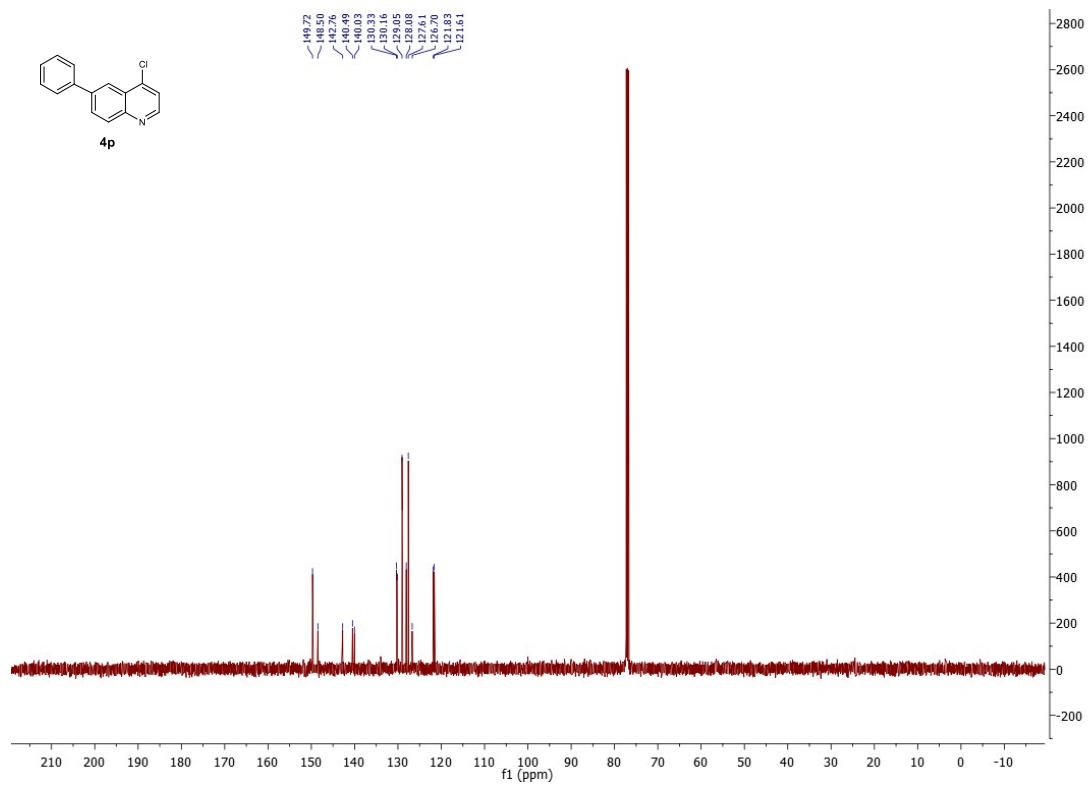

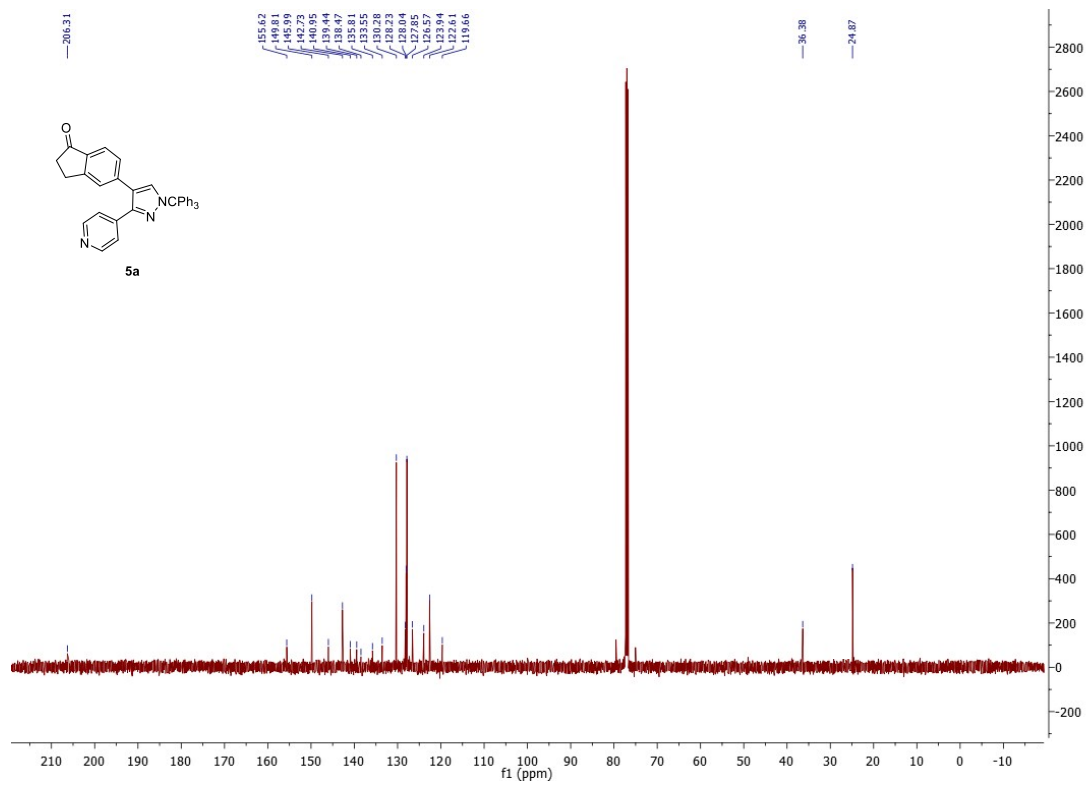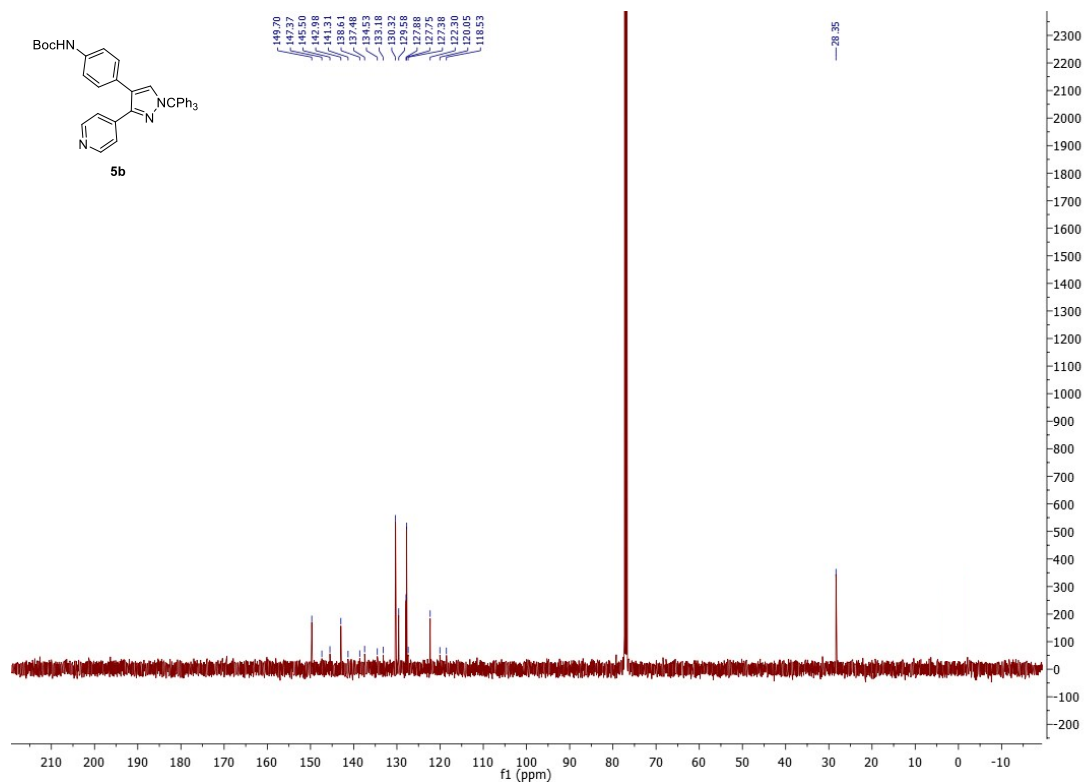

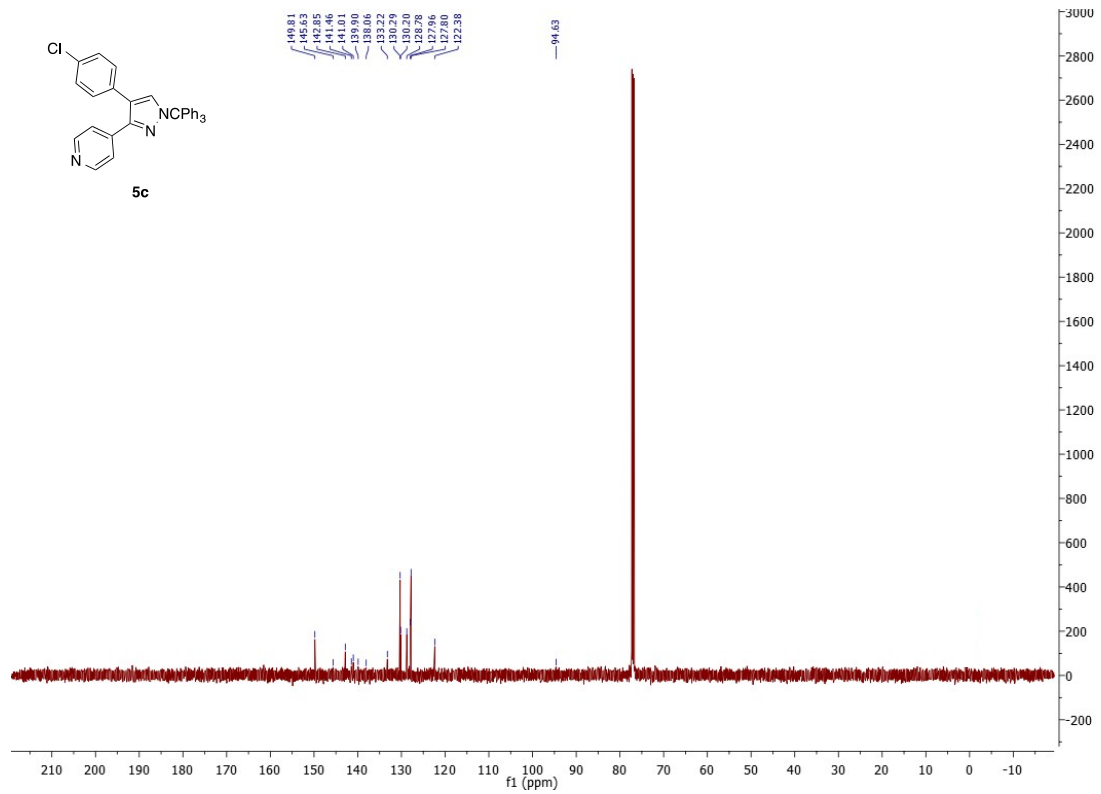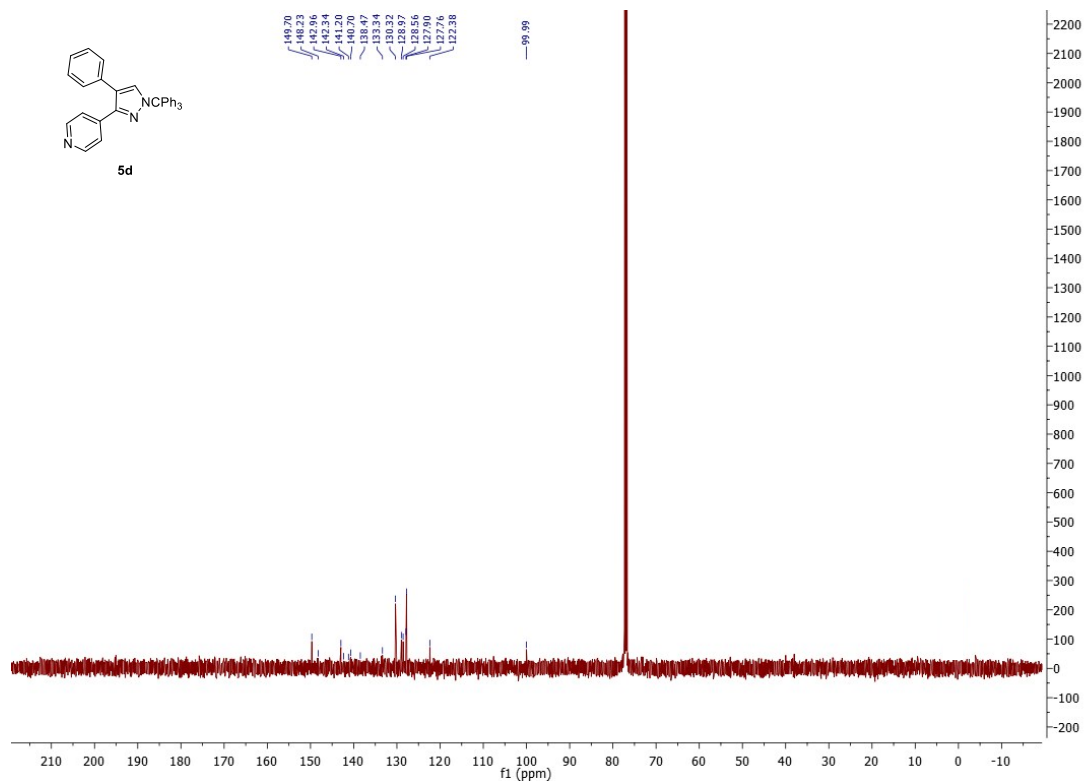

Supplement: c5ob01915j1.pdf [file c5ob01915j1.pdf]
